# Supplementary material for: Infiltration of Outdoor PM2.5 Pollution into Homes with Evaporative Coolers in Utah County
Source: MDPI journal article supplement (doi:10.3390/su16010177), 2023-12-24
Supplement: s1 [file s1]

# Infiltration of Outdoor PM<sub>2.5</sub> Pollution into Homes with Evaporative Coolers in Utah County

Darrell B. Sonntag <sup>1</sup>, Hanyong Jung <sup>1</sup>, Royce P. Harline <sup>1</sup>, Tyler C. Peterson <sup>1</sup>, Selah E. Willis <sup>2</sup>,  
Taylor R. Christensen <sup>2</sup> and James D. Johnston <sup>2,\*</sup>

<sup>1</sup> Department of Civil and Construction Engineering, Brigham Young University, Provo, UT 84602, USA; darrell\_sonntag@byu.edu (D.B.S.); jhy22@student.byu.edu (H.J.); royceph@byu.edu (R.P.H.); tylerp22@student.byu.edu (T.C.P.)

<sup>2</sup> Department of Public Health, Brigham Young University, Provo, UT 84602, USA; u1207138@utah.edu (S.E.W.); tchris99@byu.edu (T.R.C.)

\* Correspondence: james\_johnston@byu.edu; Tel.: +1-801-422-4226

## Contents

### S.1 Classification of Wildfire Smoke Events

### S.2 Removal of Incomplete Data

### S.3: Inspection of minute-by-minute Sidepak PM<sub>2.5</sub> Data

### S.4 Comparison of PM<sub>2.5</sub> Measurements from the SidePak to the Utah Division of Air Quality (UDAQ) Monitors

### S.5 Evaluation of Indoor/Outdoor PM<sub>2.5</sub> Ratios

### S.6 Temperature and Relative Humidity Data

### S.7 Infiltration Factor Estimates using Method 1

### S.8 Summary Statistics from Method 1

### S.9 Infiltration Factor Estimates using Method 2

### S.10 Comparison of Infiltration Factor Estimates using Method 1 and Method 2

### S.11 References

## S.1 Classification of Wildfire Smoke Events

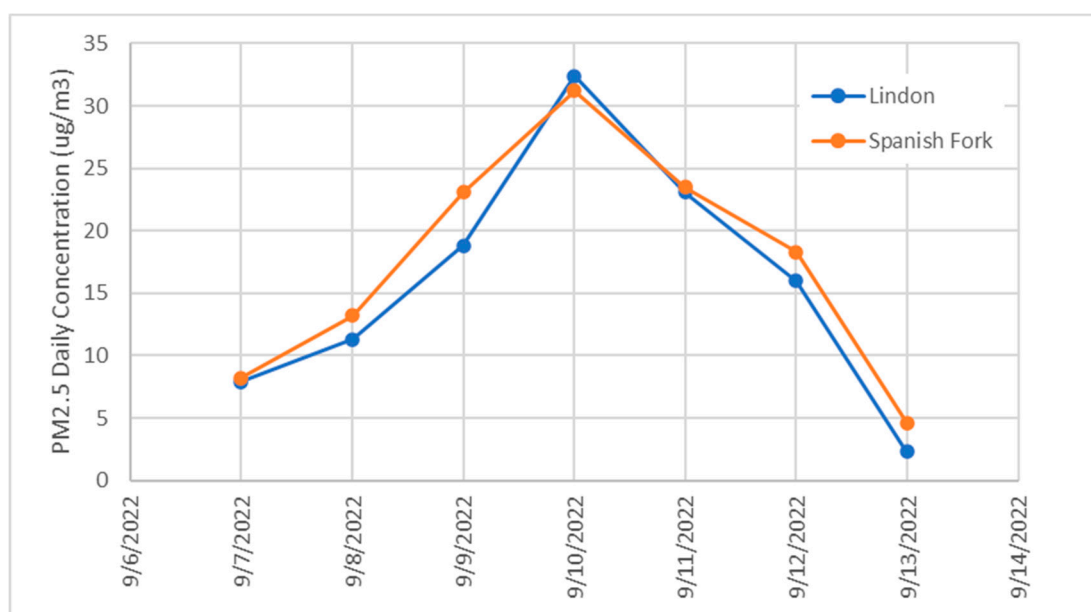

**Figure S1.** Daily average PM<sub>2.5</sub> concentrations measured at the Lindon and Spanish Fork primary monitors operated by the Utah Division of Air Quality Monitors in Utah County. Data are obtained from the AirNow Air Quality Network maintained by the US EPA [55]. We used POC 5 for Lindon and POC 3 for Spanish Fork for this graph.

Between 9/8/2022 and 9/12/2022 was the only period where we intentionally scheduled and sampled visits during a known wildfire smoke event. We evaluated if by chance we sampled during other wildfire events. For example, summertime outdoor PM<sub>2.5</sub> were elevated on 8/3/2022 and 8/14/2023 (Table S3). However, neither of these events had daily PM<sub>2.5</sub> levels that exceeded 20 µg/m<sup>3</sup>, and we did not classify them as wildfire smoke events.

## S.2 Removal of Incomplete Data

We required that each home visit had corresponding indoor and outdoor SidePak concentrations for at least 4 hours. Due to instrument failure (often due to the SidePaks turning off prematurely from lack of AC power) this criterion reduced the number of home visits from 67 from 31 homes down to 53 visits from 30 homes (H27 was removed).

## S.3 Inspection of minute-by-minute SidePak PM<sub>2.5</sub> data

For each home visit, we visually evaluated the minute-by-minute indoor and outdoor concentrations (Figures S2, S3, and S4). For eight of the home visits, the indoor PM<sub>2.5</sub> concentrations were noticeably elevated above the outdoor concentrations for at least one hour (Table S1). These included visits in homes with AC and ECs and in both summer

and winter. We suspect that these high indoor events are likely due to participants not following the study protocol, especially cooking. We removed these events from the final dataset.

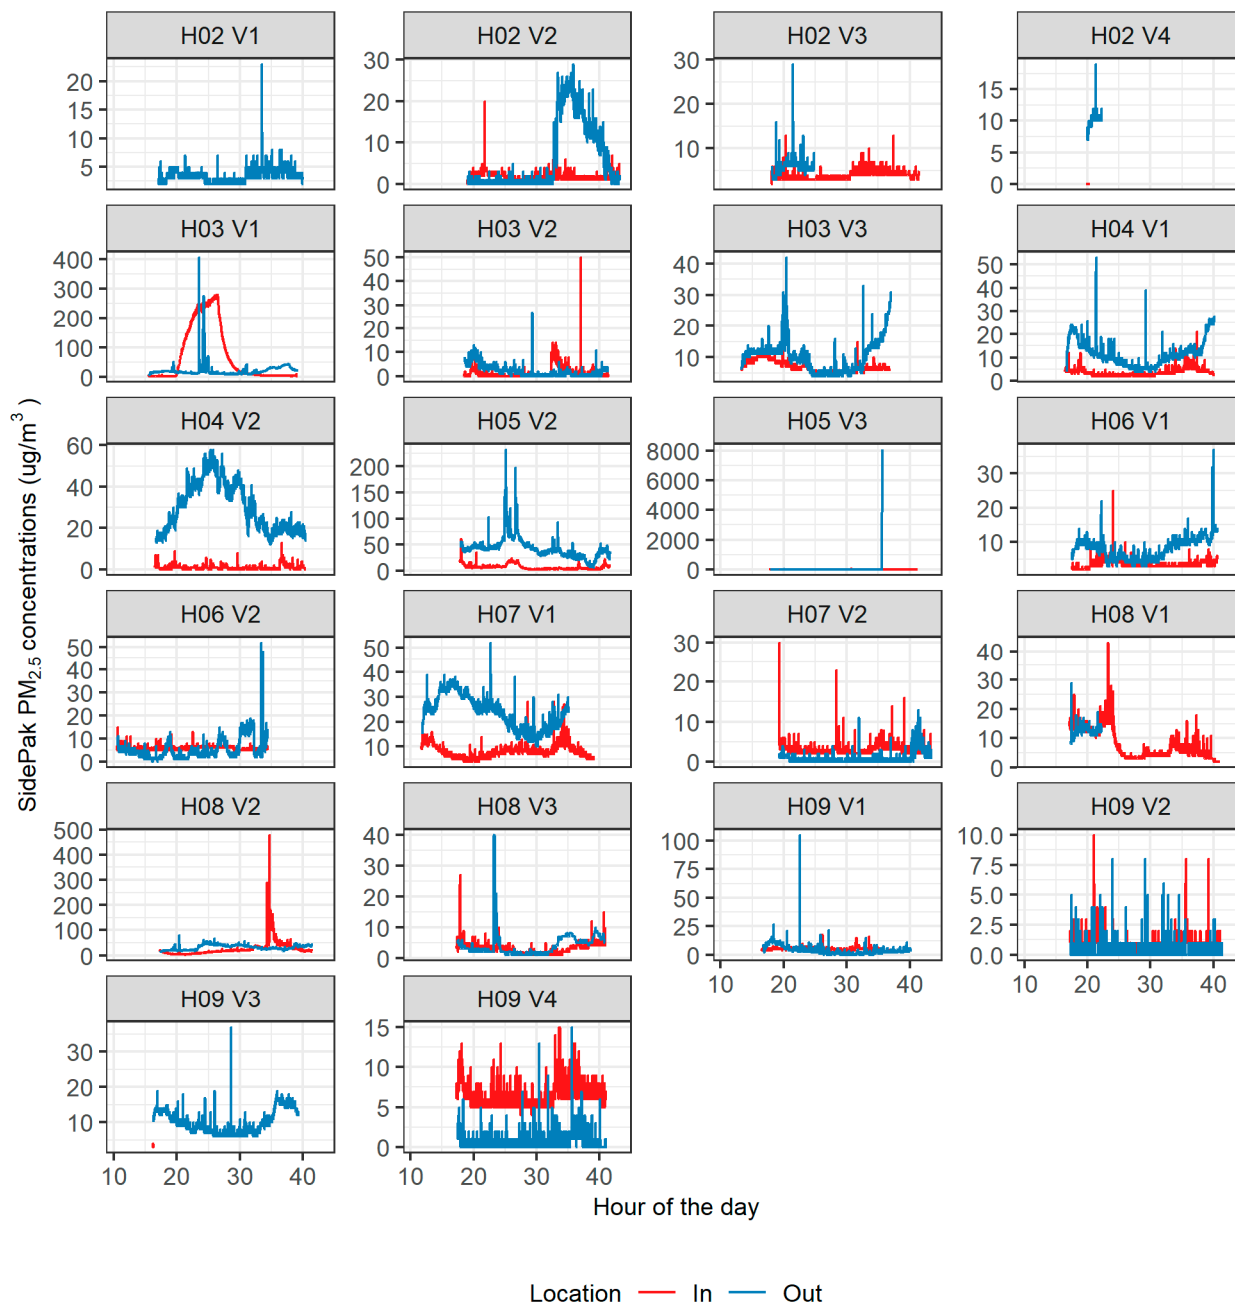

**Figure S2.** Minute-by-minute SidePak PM<sub>2.5</sub> concentration measurements from indoor and outdoor visits at homes H02 through H09.

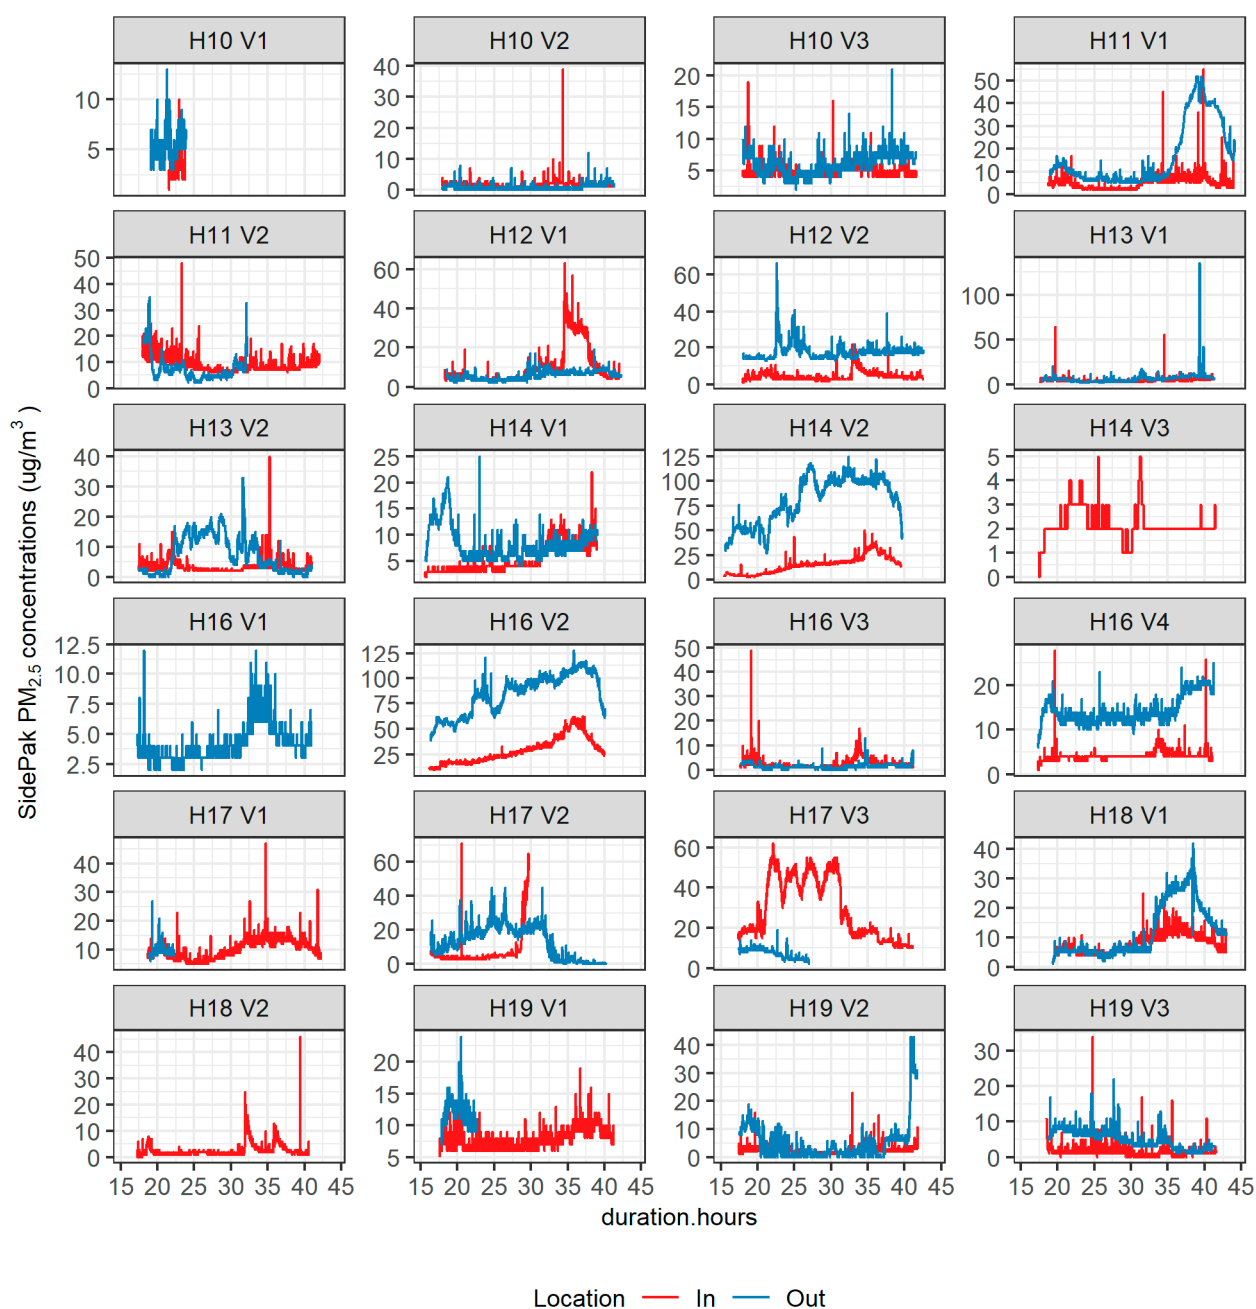

**Figure S3.** Minute-by-minute SidePak PM<sub>2.5</sub> concentration measurements from indoor and outdoor visits at homes H10 through H19.

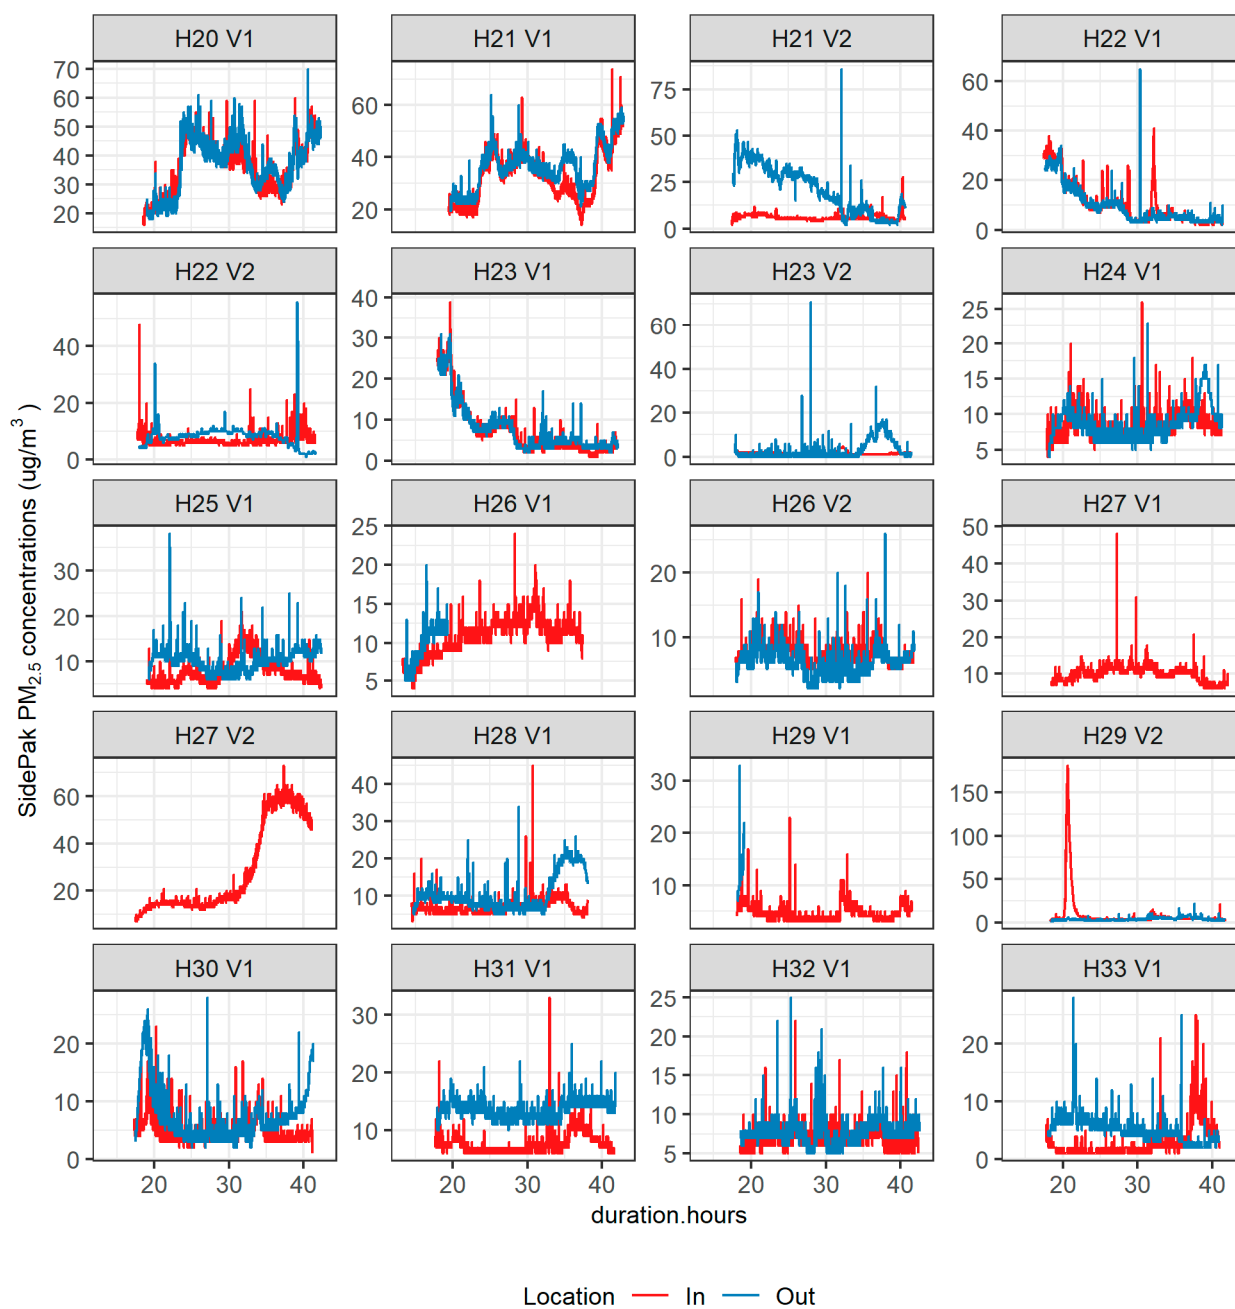

**Figure S4.** Minute-by-minute SidePak PM<sub>2.5</sub> concentration measurements from indoor and outdoor visits at homes H20 through H33.

**Table S1.** Indoor SidePak PM<sub>2.5</sub> measures suspected as being caused by participants not following the study protocol, especially cooking. We removed these events from the final dataset.

| House ID                                                                                                                                                                                                                                                                                                                                                                                                              | Type of Air Conditioner | Visit | Beginning time      | End Time            |
|-----------------------------------------------------------------------------------------------------------------------------------------------------------------------------------------------------------------------------------------------------------------------------------------------------------------------------------------------------------------------------------------------------------------------|-------------------------|-------|---------------------|---------------------|
|  <p><b>Copyright:</b> © 2023 by the authors. Licensee MDPI, Basel, Switzerland. This article is an open access article distributed under the terms and conditions of the Creative Commons Attribution (CC BY) license (<a href="https://creativecommons.org/licenses/by/4.0/">https://creativecommons.org/licenses/by/4.0/</a>).</p> |                         |       |                     |                     |
| H03                                                                                                                                                                                                                                                                                                                                                                                                                   | Central                 | V1    | 2022-07-27 19:54:00 | 2022-07-28 11:20:00 |
| H03                                                                                                                                                                                                                                                                                                                                                                                                                   | Central                 | V2    | 2022-12-09 08:19:00 | 2022-12-09 11:01:00 |
| H08                                                                                                                                                                                                                                                                                                                                                                                                                   | Central                 | V2    | 2022-09-09 10:15:00 | 2022-09-09 14:03:00 |
| H10                                                                                                                                                                                                                                                                                                                                                                                                                   | Central                 | V2    | 2022-12-01 07:45:00 | 2022-12-01 09:55:00 |
| H12                                                                                                                                                                                                                                                                                                                                                                                                                   | Central                 | V1    | 2022-08-12 10:30:00 | 2022-08-12 14:34:00 |
| H17                                                                                                                                                                                                                                                                                                                                                                                                                   | Evaporative Cooler      | V2    | 2023-01-28 04:06:00 | 2023-01-28 05:43:00 |
| H29                                                                                                                                                                                                                                                                                                                                                                                                                   | Evaporative Cooler      | V2    | 2023-08-21 20:10:00 | 2023-08-21 23:16:00 |
| H33                                                                                                                                                                                                                                                                                                                                                                                                                   | Central                 | V1    | 2023-09-01 13:02:00 | 2023-09-01 16:36:00 |

#### S.4 Comparison of PM<sub>2.5</sub> measurements from the SidePak to the Utah Division of Air Quality (UDAQ) monitors

We obtained hourly PM<sub>2.5</sub> measurements data from two air quality monitors operated by the Utah Division of Air Quality in Utah County using data from the AirNow API website [56].

**Table S2.** Utah Division of Air Quality Locations in Utah County

| Location     | Primary Monitor | Latitude  | Longitude   |
|--------------|-----------------|-----------|-------------|
| Lindon       | 1               | 40.3414   | -111.7136   |
| Spanish Fork | 3               | 40.136398 | -111.660202 |

For each home, we determined the closest of the two UDAQ air quality monitors in Utah County [57]. For each visit, we averaged across the hourly PM<sub>2.5</sub> concentrations from the reference monitors for the same time period that we conducted samples at the home with the SidePak.

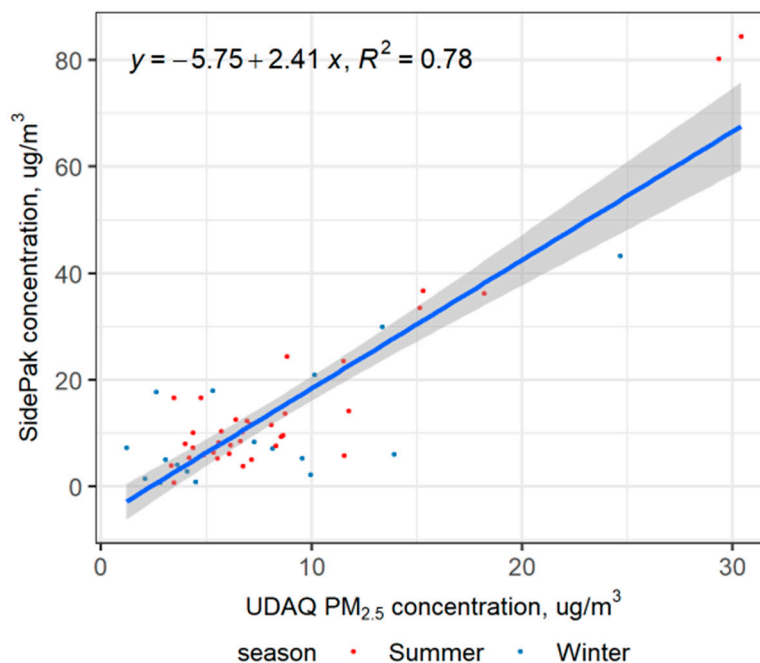

**Figure S5.** Comparison of the average PM<sub>2.5</sub> concentrations measured from the outdoor SidePak monitor and closest Utah Division of Air Quality (UDAQ) monitor for each home visit.

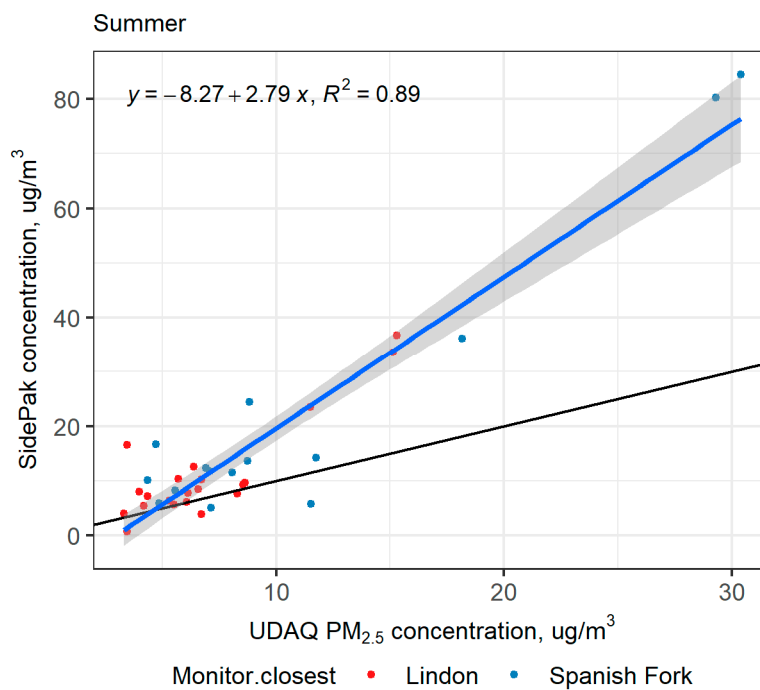

**Figure S6.** Comparison of the average PM<sub>2.5</sub> concentrations during summer measured from the outdoor SidePak monitor and closest Utah Division of Air Quality (UDAQ) monitor for each home visit.

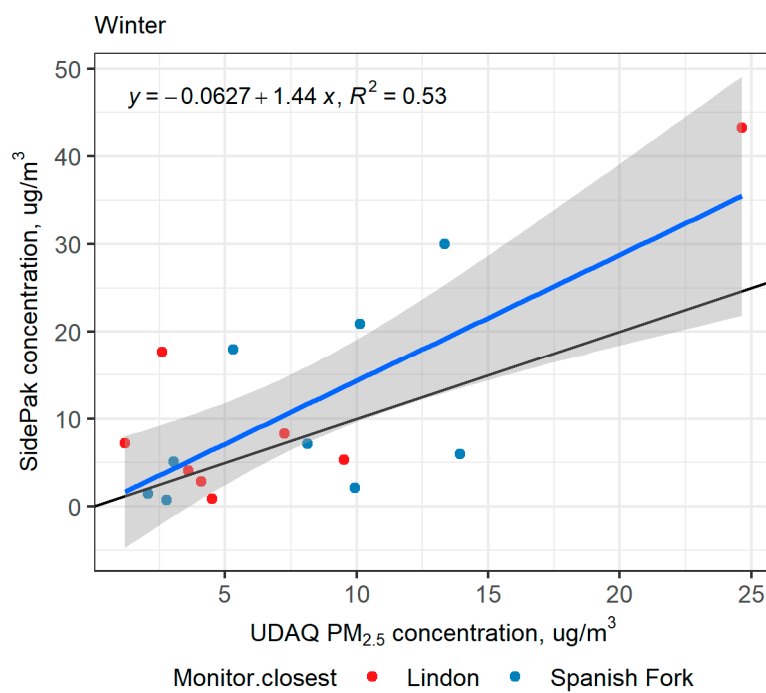

**Figure S7.** Comparison of the average  $\text{PM}_{2.5}$  concentrations during winter measured from the outdoor SidePak monitor and closest Utah Division of Air Quality (UDAQ) monitor for each home visit.



## S.5 Evaluation of Indoor /Outdoor PM<sub>2.5</sub> Ratios

We calculated the I/O SidePak PM<sub>2.5</sub> concentrations for each visit (Tables S7 and S8). We observed three large I/O outliers from visits that had low indoor PM<sub>2.5</sub> concentrations, but extremely low outdoor concentrations ( $< 1 \mu\text{g}/\text{m}^3$ ). These visits included one visit in the summer (Home 09 V4), and two visits in the winter (Home 07 V2, and H10 V2). Home 09 V4 occurred on August 21 and 22, 2023, when Provo also received 0.25 inches of rain [58]. The average outdoor concentration for this visit was only 18% of the outdoor PM<sub>2.5</sub> concentration for the closest reference monitor. Home 07 V2 and H10 V2 occurred on March 9, 2023 and November 30, 2022, respectively. The outdoor SidePak concentrations were 19% and 24% of the nearest reference monitor PM<sub>2.5</sub> concentrations.

**Table S3.** Average indoor and outdoor SidePak concentrations and comparison to the reference monitor for visits from houses with central air conditioning.

| House Number | Visit | Date       | Indoor SidePak PM <sub>2.5</sub> (µg/m <sup>3</sup> ) | Outdoor SidePak PM <sub>2.5</sub> (µg/m <sup>3</sup> ) | I/O  | Reference Monitor Location | Reference Monitor PM <sub>2.5</sub> (µg/m <sup>3</sup> ) | Ratio of Outdoor SidePak to Reference Monitor Concentration |
|--------------|-------|------------|-------------------------------------------------------|--------------------------------------------------------|------|----------------------------|----------------------------------------------------------|-------------------------------------------------------------|
| H03          | V1    | 7/27/2022  | 2.65                                                  | 24.45                                                  | 0.11 | Spanish Fork               | 8.82                                                     | 2.77                                                        |
| H04          | V1    | 7/28/2022  | 3.67                                                  | 11.56                                                  | 0.32 | Spanish Fork               | 8.07                                                     | 1.43                                                        |
| H06          | V1    | 8/1/2022   | 3.48                                                  | 7.93                                                   | 0.44 | Lindon                     | 3.99                                                     | 1.99                                                        |
| H07          | V1    | 8/3/2022   | 8.09                                                  | 23.51                                                  | 0.34 | Lindon                     | 11.50                                                    | 2.04                                                        |
| H08          | V1    | 8/9/2022   | 13.67                                                 | 12.55                                                  | 1.09 | Lindon                     | 6.38                                                     | 1.97                                                        |
| H09          | V1    | 8/9/2022   | 4.81                                                  | 3.83                                                   | 1.26 | Lindon                     | 6.73                                                     | 0.57                                                        |
| H13          | V1    | 8/10/2022  | 4.80                                                  | 6.32                                                   | 0.76 | Lindon                     | 5.32                                                     | 1.19                                                        |
| H12          | V1    | 8/11/2022  | 5.97                                                  | 5.28                                                   | 1.13 | Lindon                     | 5.51                                                     | 0.96                                                        |
| H14          | V1    | 8/15/2022  | 5.26                                                  | 8.27                                                   | 0.64 | Spanish Fork               | 5.56                                                     | 1.49                                                        |
| H11          | V1    | 8/16/2022  | 5.04                                                  | 16.63                                                  | 0.30 | Spanish Fork               | 4.72                                                     | 3.53                                                        |
| H08          | V2    | 9/8/2022   | 16.90                                                 | 33.52                                                  | 0.50 | Lindon                     | 15.14                                                    | 2.21                                                        |
| H14          | V2    | 9/9/2022   | 15.36                                                 | 80.31                                                  | 0.19 | Spanish Fork               | 29.32                                                    | 2.74                                                        |
| H16          | V2    | 9/9/2022   | 29.15                                                 | 84.50                                                  | 0.34 | Spanish Fork               | 30.39                                                    | 2.78                                                        |
| H11          | V2    | 11/16/2022 | 9.31                                                  | 7.12                                                   | 1.31 | Spanish Fork               | 8.12                                                     | 0.88                                                        |
| H06          | V2    | 11/17/2022 | 5.92                                                  | 5.30                                                   | 1.12 | Lindon                     | 9.53                                                     | 0.56                                                        |
| H02          | V2    | 11/21/2022 | 1.71                                                  | 5.97                                                   | 0.29 | Spanish Fork               | 13.92                                                    | 0.43                                                        |
| H10          | V2    | 11/30/2022 | 1.36                                                  | 0.70                                                   | 1.93 | Spanish Fork               | 2.79                                                     | 0.25                                                        |
| H03          | V2    | 12/8/2022  | 0.58                                                  | 2.13                                                   | 0.27 | Spanish Fork               | 9.94                                                     | 0.21                                                        |
| H04          | V2    | 1/25/2023  | 1.03                                                  | 29.99                                                  | 0.03 | Spanish Fork               | 13.33                                                    | 2.25                                                        |
| H05          | V2    | 2/2/2023   | 7.53                                                  | 43.28                                                  | 0.17 | Lindon                     | 24.63                                                    | 1.76                                                        |
| H07          | V2    | 3/9/2023   | 3.07                                                  | 0.83                                                   | 3.71 | Lindon                     | 4.50                                                     | 0.18                                                        |
| H12          | V2    | 3/27/2023  | 4.67                                                  | 17.67                                                  | 0.26 | Lindon                     | 2.61                                                     | 6.76                                                        |
| H16          | V3    | 3/30/2023  | 2.36                                                  | 1.40                                                   | 1.68 | Spanish Fork               | 2.08                                                     | 0.68                                                        |
| H13          | V2    | 4/4/2023   | 3.20                                                  | 7.20                                                   | 0.44 | Lindon                     | 1.20                                                     | 6.00                                                        |
| H08          | V3    | 4/13/2023  | 2.94                                                  | 4.09                                                   | 0.72 | Lindon                     | 3.60                                                     | 1.13                                                        |
| H03          | V3    | 8/3/2023   | 6.98                                                  | 10.07                                                  | 0.69 | Spanish Fork               | 4.35                                                     | 2.32                                                        |
| H10          | V3    | 8/3/2023   | 4.79                                                  | 5.89                                                   | 0.81 | Spanish Fork               | 4.85                                                     | 1.21                                                        |
| H16          | V4    | 8/14/2023  | 4.13                                                  | 14.17                                                  | 0.29 | Spanish Fork               | 11.76                                                    | 1.20                                                        |
| H02          | V3    | 8/15/2023  | 3.28                                                  | 5.81                                                   | 0.56 | Spanish Fork               | 11.52                                                    | 0.50                                                        |
| H05          | V3    | 8/21/2023  | 6.22                                                  | 16.57                                                  | 0.38 | Lindon                     | 3.45                                                     | 4.80                                                        |
| H09          | V4    | 8/21/2023  | 6.41                                                  | 0.67                                                   | 9.53 | Lindon                     | 3.45                                                     | 0.19                                                        |
| H31          | V1    | 8/24/2023  | 7.52                                                  | 13.65                                                  | 0.55 | Spanish Fork               | 8.73                                                     | 1.56                                                        |
| H33          | V1    | 8/31/2023  | 1.81                                                  | 5.44                                                   | 0.33 | Lindon                     | 4.18                                                     | 1.30                                                        |

**Table S4.** Average indoor and outdoor SidePak concentrations and comparison to the reference monitor for visits from houses with evaporative coolers.

| House Number | Visit | Date      | Indoor SidePak PM <sub>2.5</sub> (µg/m <sup>3</sup> ) | Outdoor SidePak PM <sub>2.5</sub> (µg/m <sup>3</sup> ) | I/O  | Reference Monitor Location | Reference Monitor PM <sub>2.5</sub> (µg/m <sup>3</sup> ) | Ratio of Outdoor SidePak to Reference Monitor Concentration |
|--------------|-------|-----------|-------------------------------------------------------|--------------------------------------------------------|------|----------------------------|----------------------------------------------------------|-------------------------------------------------------------|
| H18          | V1    | 9/1/2022  | 7.91                                                  | 12.27                                                  | 0.64 | Spanish Fork               | 6.91                                                     | 1.78                                                        |
| H19          | V1    | 9/2/2022  | 7.25                                                  | 11.70                                                  | 0.62 | Spanish Fork               | 7.08                                                     | 1.65                                                        |
| H20          | V1    | 9/8/2022  | 36.07                                                 | 36.72                                                  | 0.98 | Lindon                     | 15.29                                                    | 2.40                                                        |
| H21          | V1    | 9/8/2022  | 32.58                                                 | 36.20                                                  | 0.90 | Spanish Fork               | 18.18                                                    | 1.99                                                        |
| H22          | V1    | 9/12/2022 | 10.02                                                 | 9.31                                                   | 1.08 | Lindon                     | 8.55                                                     | 1.09                                                        |
| H23          | V1    | 9/12/2022 | 7.17                                                  | 7.63                                                   | 0.94 | Lindon                     | 8.29                                                     | 0.92                                                        |
| H21          | V2    | 12/8/2022 | 5.85                                                  | 20.91                                                  | 0.28 | Spanish Fork               | 10.14                                                    | 2.06                                                        |
| H17          | V2    | 1/27/2023 | 4.33                                                  | 17.96                                                  | 0.24 | Spanish Fork               | 5.30                                                     | 3.39                                                        |
| H19          | V2    | 2/10/2023 | 2.44                                                  | 5.08                                                   | 0.48 | Spanish Fork               | 3.05                                                     | 1.67                                                        |
| H22          | V2    | 3/3/2023  | 6.89                                                  | 8.32                                                   | 0.83 | Lindon                     | 7.25                                                     | 1.15                                                        |
| H23          | V2    | 4/6/2023  | 1.57                                                  | 2.85                                                   | 0.55 | Lindon                     | 4.09                                                     | 0.70                                                        |
| H24          | V1    | 7/13/2023 | 8.22                                                  | 8.51                                                   | 0.97 | Lindon                     | 6.59                                                     | 1.29                                                        |
| H25          | V1    | 7/13/2023 | 7.78                                                  | 10.16                                                  | 0.77 | Lindon                     | 6.71                                                     | 1.51                                                        |
| H26          | V1    | 7/20/2023 | 7.63                                                  | 9.62                                                   | 0.79 | Lindon                     | 8.62                                                     | 1.12                                                        |
| H28          | V1    | 7/27/2023 | 6.83                                                  | 10.35                                                  | 0.66 | Lindon                     | 5.70                                                     | 1.82                                                        |
| H30          | V1    | 8/10/2023 | 4.70                                                  | 7.18                                                   | 0.65 | Lindon                     | 4.36                                                     | 1.65                                                        |
| H29          | V2    | 8/21/2023 | 4.18                                                  | 3.95                                                   | 1.06 | Lindon                     | 3.33                                                     | 1.19                                                        |
| H26          | V2    | 8/28/2023 | 7.65                                                  | 6.16                                                   | 1.24 | Lindon                     | 6.08                                                     | 1.01                                                        |
| H32          | V1    | 8/28/2023 | 6.76                                                  | 7.74                                                   | 0.87 | Lindon                     | 6.13                                                     | 1.26                                                        |
| H19          | V3    | 8/31/2023 | 1.39                                                  | 5.01                                                   | 0.28 | Spanish Fork               | 7.13                                                     | 0.70                                                        |

Figure S8 shows the I/O ratios organized by house number and visit for the final dataset.

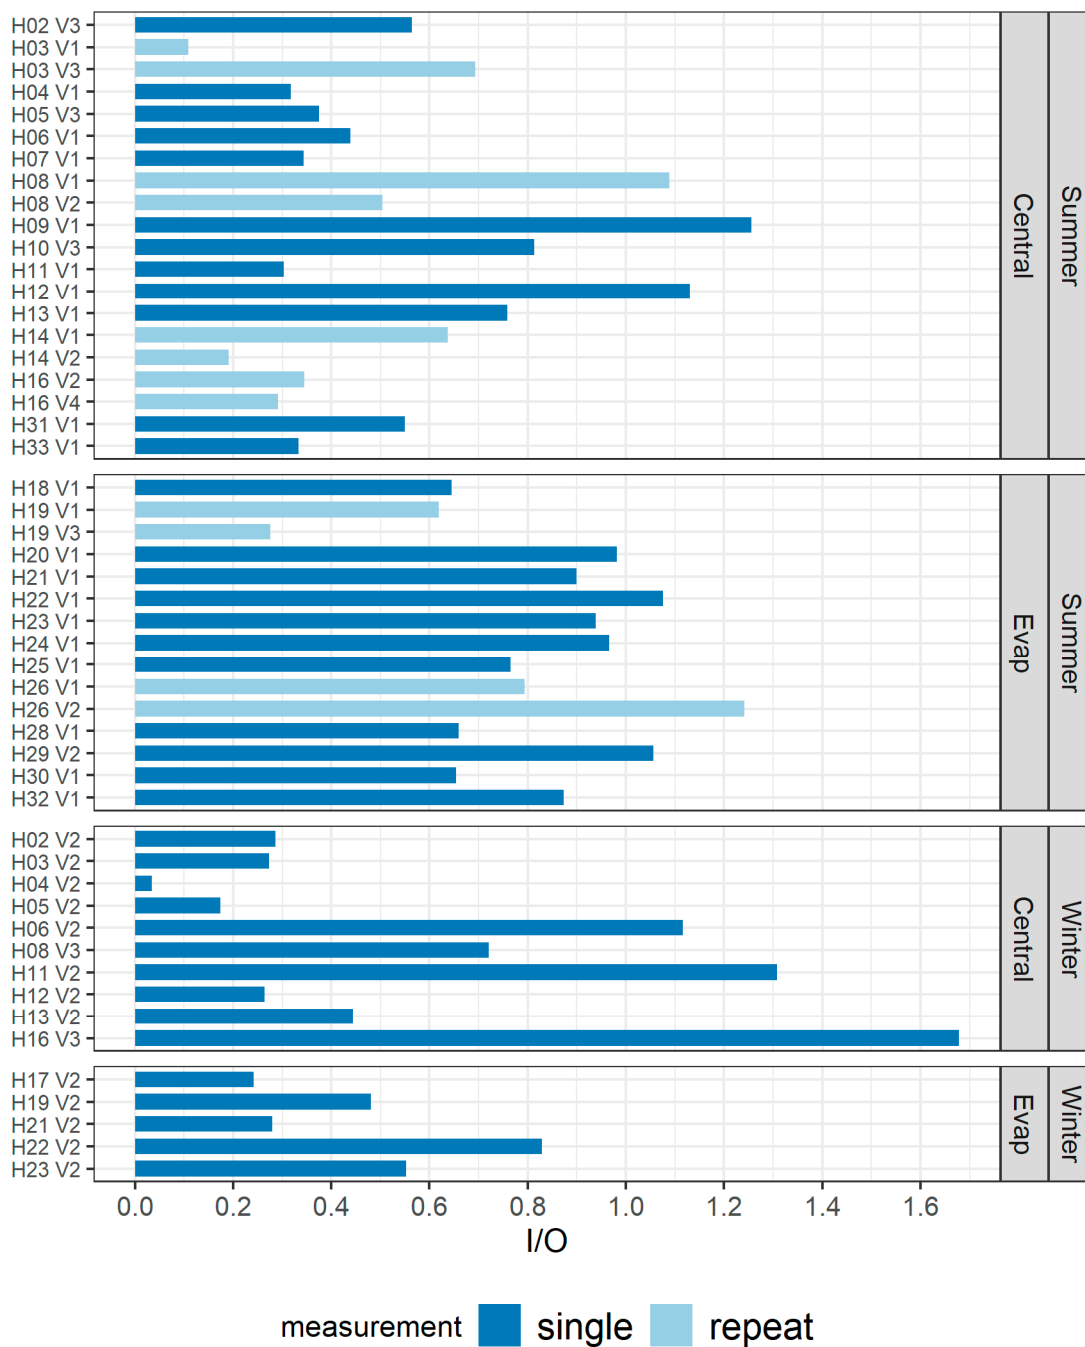

**Figure S8.** I/O ratio for each visit. Repeated measurements from the same house during the same season are colored in light-blue.

Figure S9 displays the box plots of the concentration data and I/O ratios for the summer visits when the wildfire event visits were removed.

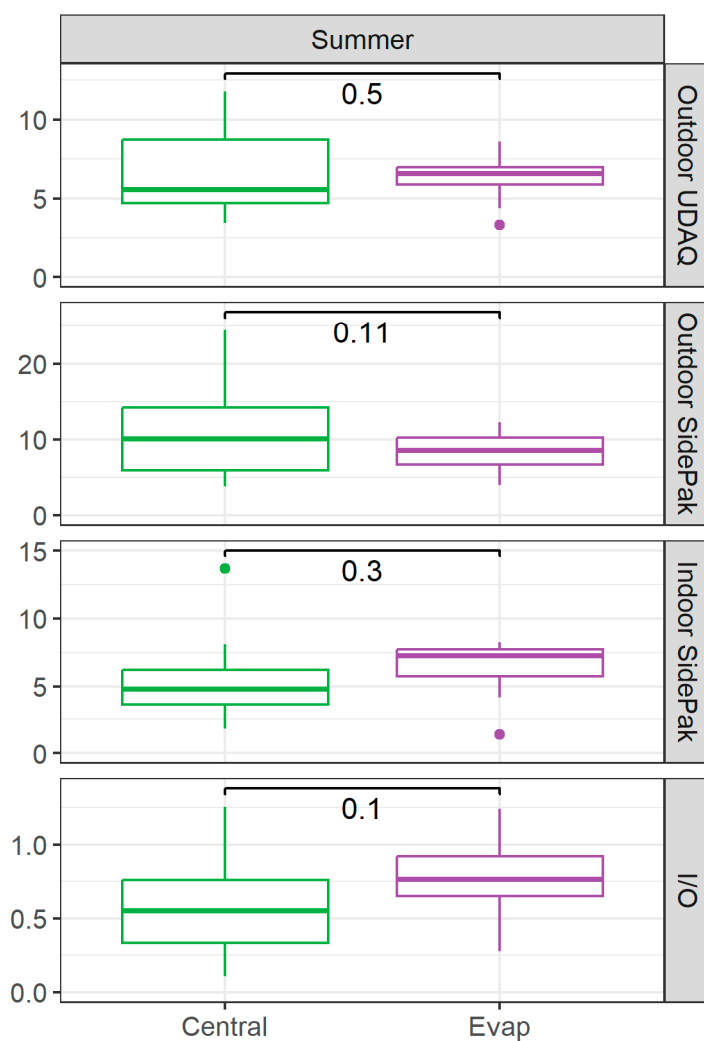

**Figure S9.** Box plots of average concentration statistics from the summer house visits organized by air conditioner type. The seven house visits that occurred during the September 8–12, 2022 wildfire smoke event were removed. The horizon lines and numbers are the p-values comparing the averages from a two-sample t-test.

S.6 Temperature and relative humidity data

**Table S5.** Summary statistics of the average indoor temperature, °C, from each home visit by air conditioning type and season in Utah County.

|             | N  | Temperature (Indoor) |      |      |      | Temperature (Outdoor) |      |      |      |
|-------------|----|----------------------|------|------|------|-----------------------|------|------|------|
|             |    | Mean                 | s.d. | Min  | Max  | Mean                  | s.d. | Min  | Max  |
| Summer      | 33 |                      |      |      |      |                       |      |      |      |
| Central     | 19 | 22.6                 | 1.6  | 16.6 | 24.1 | 26.1                  | 3.2  | 20.4 | 31.8 |
| Evaporative | 14 | 22.2                 | 1.7  | 19.7 | 25.8 | 25.8                  | 3.0  | 21.3 | 31.9 |
| Winter      | 12 |                      |      |      |      |                       |      |      |      |
| Central     | 7  | 19.3                 | 0.7  | 18.2 | 20.1 | 1.1                   | 2.7  | -1.8 | 5.5  |
| Evaporative | 5  | 20.3                 | 0.9  | 18.9 | 21.5 | 3.9                   | 4.2  | 0.2  | 11.0 |

**Table S6.** Summary statistics of the average relative humidity from each home visit by air conditioning type and season in Utah County

|             | N  | RH (Indoor) |      |      |      | RH (Outdoor) |      |      |      |
|-------------|----|-------------|------|------|------|--------------|------|------|------|
|             |    | Mean        | s.d. | Min  | Max  | Mean         | s.d. | Min  | Max  |
| Summer      | 33 |             |      |      |      |              |      |      |      |
| Central     | 19 | 44.6        | 6.4  | 34.7 | 58.1 | 44.3         | 15.1 | 24.6 | 73.3 |
| Evaporative | 14 | 52.5        | 11.9 | 31.2 | 76.2 | 37.2         | 12.6 | 17.6 | 63.3 |
| Winter      | 12 |             |      |      |      |              |      |      |      |
| Central     | 7  | 33.0        | 5.5  | 27.4 | 42.1 | 60.6         | 10.8 | 43.4 | 74.1 |
| Evaporative | 5  | 24.0        | 4.8  | 19.6 | 31.4 | 50.5         | 21.0 | 25.4 | 72.6 |

**Table S7.** Summary statistics of the maximum outdoor temperature °C from each summer home visit by air conditioning type in Utah County.

|             | N  | Temperature(max) |      |      |      |
|-------------|----|------------------|------|------|------|
|             |    | Mean             | s.d. | Min  | Max  |
| Summer      | 29 |                  |      |      |      |
| Central     | 16 | 45.1             | 10.5 | 22.1 | 59.4 |
| Evaporative | 13 | 42.7             | 11.7 | 24.4 | 62.2 |

**Table S8.** Summary statistics of the minimum outdoor temperature °C from each winter home visit by air conditioning type in Utah County.

|             | N  | Temperature (min) |      |      |      |
|-------------|----|-------------------|------|------|------|
|             |    | Mean              | s.d. | Min  | Max  |
| Winter      | 15 |                   |      |      |      |
| Central     | 10 | -6.4              | 2.7  | -9.4 | -0.3 |
| Evaporative | 5  | -1.6              | 2.3  | -4.1 | 0.7  |

## S.7 Infiltration Factor Estimates using Method 1

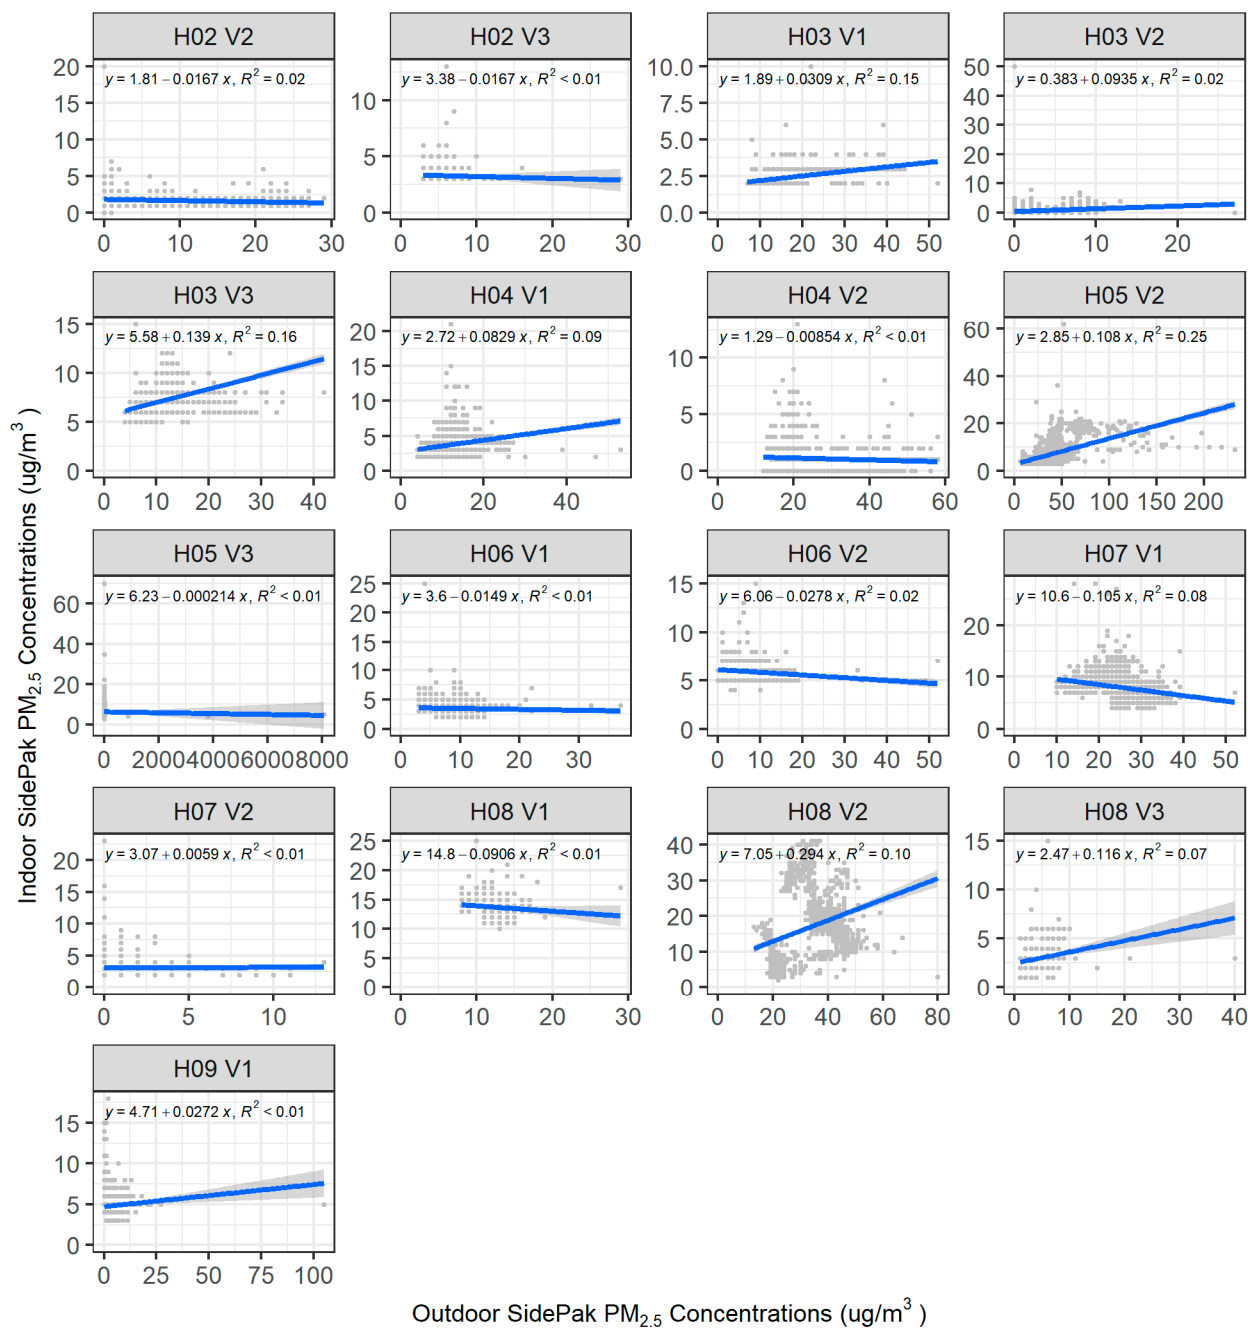

**Figure S10.** Correlation of indoor and outdoor SidePak PM<sub>2.5</sub> concentrations for visits at houses H02 through H09.



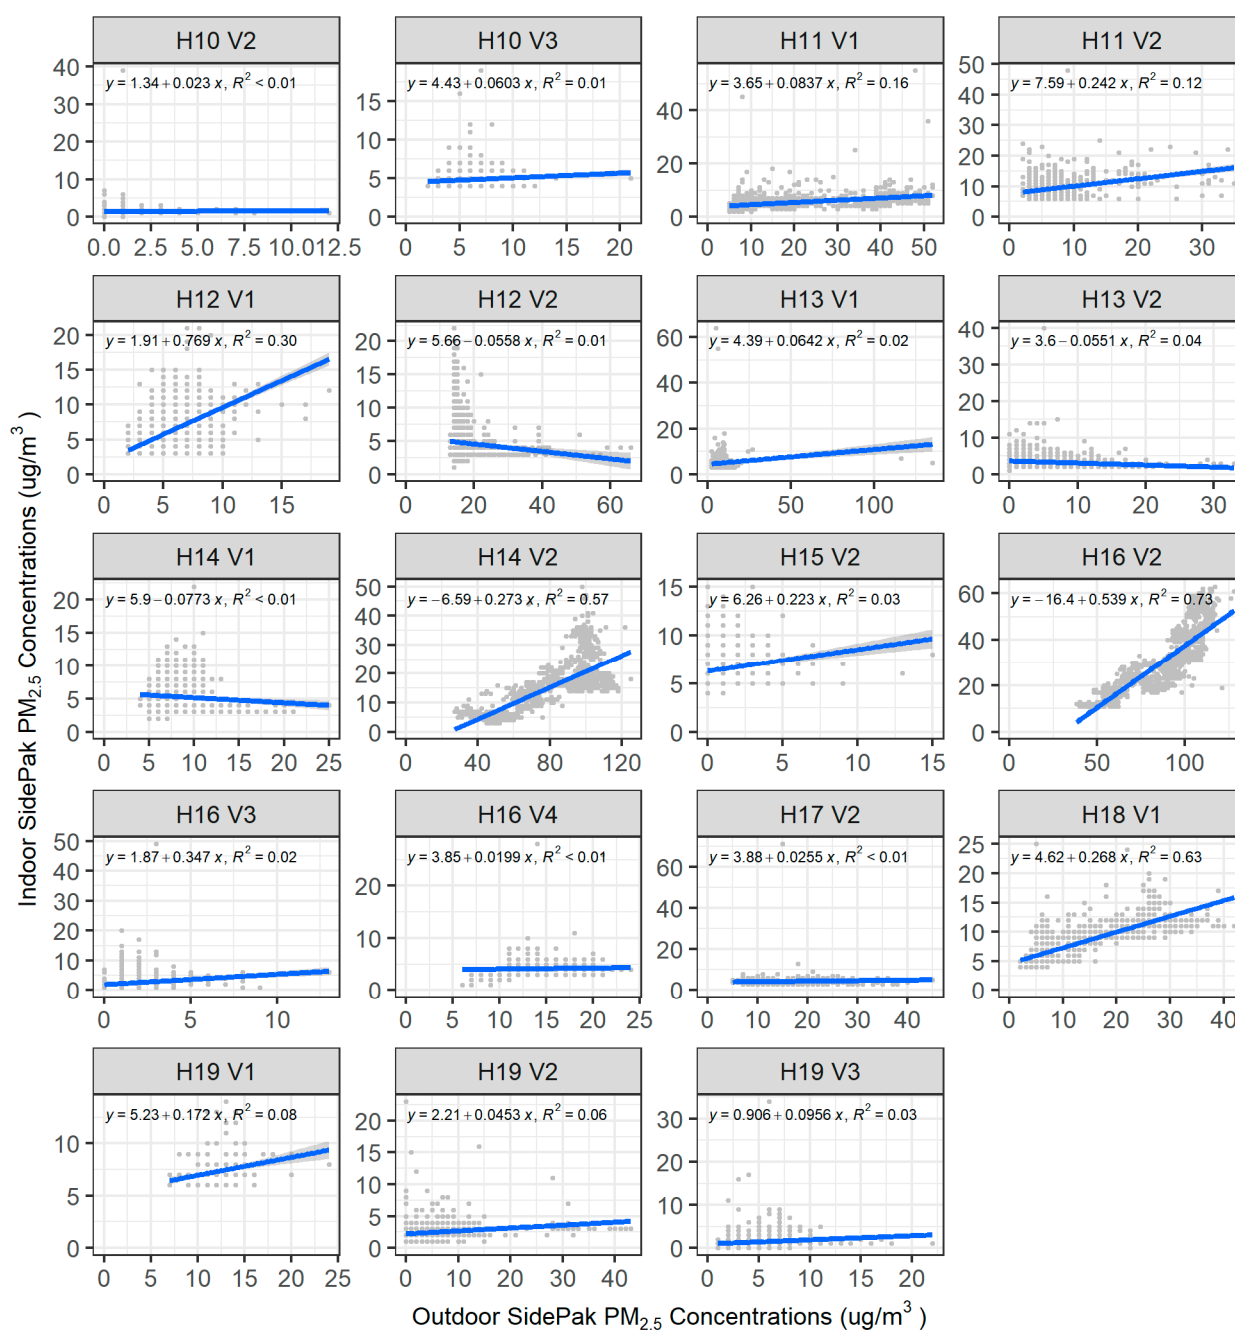

**Figure S11.** Correlation of indoor and outdoor SidePak PM<sub>2.5</sub> concentrations for visits at houses H10 through H19.

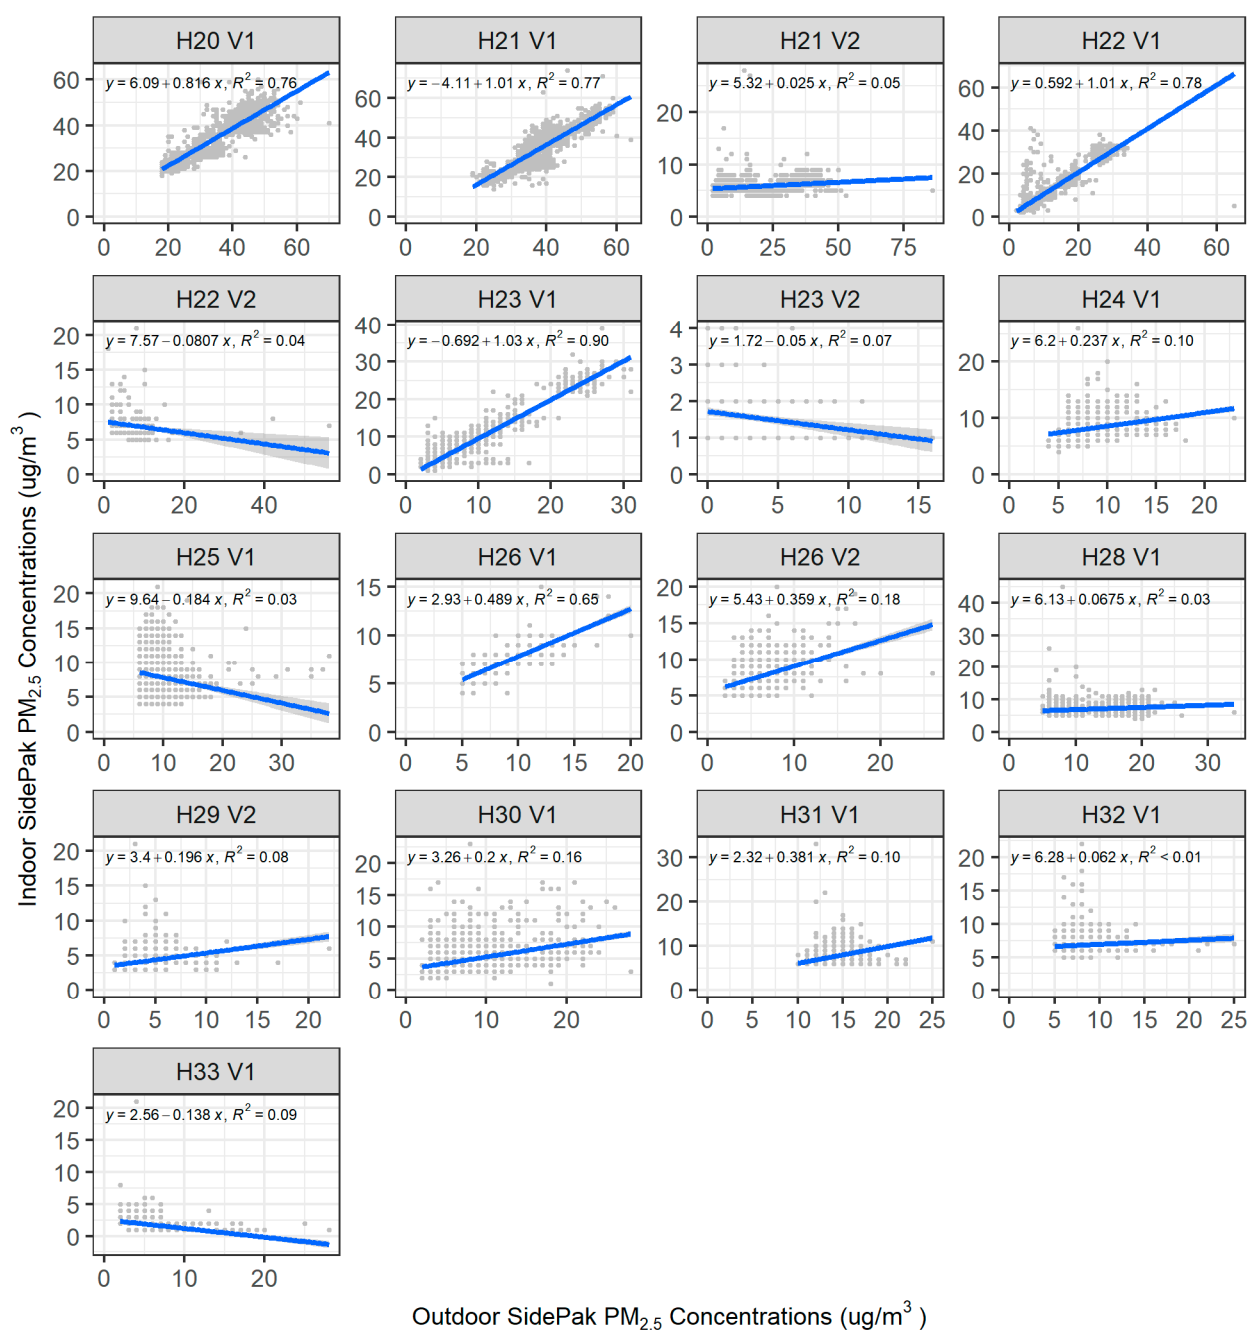

**Figure S12.** Correlation of indoor and outdoor SidePak PM<sub>2.5</sub> concentrations for visits at houses H20 through H33.

**Table S9.** Estimated Indoor Contribution ( $C_s$ ) and Infiltration Factor ( $F_{in}$ ) and goodness of fit ( $R^2$ ) and significance (p-value) from fitting Equation (1) to each AC visit. The lower (2.5%) and upper (97.5%) bounds on the 95% confidence intervals are estimated for  $C_s$  and  $F_{in}$ .

| House Number | Visit | Date       | $C_s$  | $C_s$ (2.5%) | $C_s$ (97.5%) | $F_{in}$ | $F_{in}$ (2.5%) | $F_{in}$ (97.5%) | $R^2$ |
|--------------|-------|------------|--------|--------------|---------------|----------|-----------------|------------------|-------|
| H03          | V1    | 7/27/2022  | 1.89   | 1.72         | 2.07          | 0.03     | 0.02            | 0.04             | 0.15  |
| H04          | V1    | 7/28/2022  | 2.72   | 2.54         | 2.89          | 0.08     | 0.07            | 0.10             | 0.09  |
| H06          | V1    | 8/1/2022   | 3.60   | 3.45         | 3.75          | -0.01    | -0.03           | 0.00             | 0.00  |
| H07          | V1    | 8/3/2022   | 10.56  | 10.09        | 11.03         | -0.11    | -0.12           | -0.09            | 0.08  |
| H08          | V1    | 8/9/2022   | 14.80  | 13.40        | 16.20         | -0.09    | -0.20           | 0.02             | 0.01  |
| H09          | V1    | 8/9/2022   | 4.71   | 4.61         | 4.80          | 0.03     | 0.01            | 0.04             | 0.01  |
| H13          | V1    | 8/10/2022  | 4.39   | 4.19         | 4.60          | 0.06     | 0.04            | 0.09             | 0.02  |
| H12          | V1    | 8/11/2022  | 1.91   | 1.52         | 2.29          | 0.77     | 0.70            | 0.84             | 0.30  |
| H14          | V1    | 8/15/2022  | 5.90   | 5.52         | 6.29          | -0.08    | -0.12           | -0.03            | 0.01  |
| H11          | V1    | 8/16/2022  | 3.65   | 3.44         | 3.87          | 0.08     | 0.07            | 0.09             | 0.16  |
| H08          | V2    | 9/8/2022   | 7.05   | 5.32         | 8.77          | 0.29     | 0.24            | 0.34             | 0.10  |
| H14          | V2    | 9/9/2022   | -6.59  | -7.61        | -5.57         | 0.27     | 0.26            | 0.29             | 0.57  |
| H16          | V2    | 9/9/2022   | -16.41 | -17.91       | -14.91        | 0.54     | 0.52            | 0.56             | 0.73  |
| H11          | V2    | 11/16/2022 | 7.59   | 7.20         | 7.97          | 0.24     | 0.20            | 0.29             | 0.12  |
| H06          | V2    | 11/17/2022 | 6.06   | 6.00         | 6.13          | -0.03    | -0.04           | -0.02            | 0.02  |
| H02          | V2    | 11/21/2022 | 1.81   | 1.75         | 1.87          | -0.02    | -0.02           | -0.01            | 0.02  |
| H03          | V2    | 12/8/2022  | 0.38   | 0.25         | 0.51          | 0.09     | 0.05            | 0.13             | 0.02  |
| H04          | V2    | 1/25/2023  | 1.29   | 1.14         | 1.44          | -0.01    | -0.01           | 0.00             | 0.01  |
| H05          | V2    | 2/2/2023   | 2.85   | 2.37         | 3.33          | 0.11     | 0.10            | 0.12             | 0.25  |
| H12          | V2    | 3/27/2023  | 5.66   | 5.19         | 6.13          | -0.06    | -0.08           | -0.03            | 0.01  |
| H16          | V3    | 3/30/2023  | 1.87   | 1.67         | 2.07          | 0.35     | 0.23            | 0.46             | 0.02  |
| H13          | V2    | 4/4/2023   | 3.60   | 3.46         | 3.73          | -0.06    | -0.07           | -0.04            | 0.04  |
| H08          | V3    | 4/13/2023  | 2.47   | 2.19         | 2.75          | 0.12     | 0.07            | 0.16             | 0.07  |
| H03          | V3    | 8/3/2023   | 5.58   | 5.39         | 5.76          | 0.14     | 0.12            | 0.16             | 0.16  |
| H10          | V3    | 8/3/2023   | 4.43   | 4.26         | 4.61          | 0.06     | 0.03            | 0.09             | 0.01  |
| H16          | V4    | 8/14/2023  | 3.85   | 3.56         | 4.14          | 0.02     | 0.00            | 0.04             | 0.00  |
| H02          | V3    | 8/15/2023  | 3.38   | 3.11         | 3.64          | -0.02    | -0.06           | 0.03             | 0.00  |
| H05          | V3    | 8/21/2023  | 6.23   | 6.00         | 6.45          | 0.00     | 0.00            | 0.00             | 0.00  |
| H31          | V1    | 8/24/2023  | 2.32   | 1.52         | 3.12          | 0.38     | 0.32            | 0.44             | 0.10  |
| H33          | V1    | 8/31/2023  | 2.56   | 2.42         | 2.71          | -0.14    | -0.16           | -0.11            | 0.09  |

**Table S10.** Estimated Indoor Contribution ( $C_s$ ) and Infiltration Factor ( $F_{in}$ ) and goodness of fit ( $R^2$ ) and significance (p-value) from fitting Equation (1) to each EC visit. The lower (2.5%) and upper (97.5%) bounds on the 95% confidence intervals are estimated for  $C_s$  and  $F_{in}$ .

| House Number | Visit | Date      | $C_s$ | $C_s$ (2.5%) | $C_s$ (97.5%) | $F_{in}$ | $F_{in}$ (2.5%) | $F_{in}$ (97.5%) | $R^2$ |
|--------------|-------|-----------|-------|--------------|---------------|----------|-----------------|------------------|-------|
| H18          | V1    | 9/1/2022  | 4.62  | 4.45         | 4.78          | 0.27     | 0.26            | 0.28             | 0.63  |
| H19          | V1    | 9/2/2022  | 5.23  | 4.41         | 6.05          | 0.17     | 0.10            | 0.24             | 0.08  |
| H20          | V1    | 9/8/2022  | 6.09  | 5.16         | 7.01          | 0.82     | 0.79            | 0.84             | 0.76  |
| H21          | V1    | 9/8/2022  | -4.11 | -5.21        | -3.01         | 1.01     | 0.98            | 1.04             | 0.77  |
| H22          | V1    | 9/12/2022 | 0.59  | 0.26         | 0.93          | 1.01     | 0.98            | 1.04             | 0.78  |
| H23          | V1    | 9/12/2022 | -0.69 | -0.86        | -0.52         | 1.03     | 1.01            | 1.05             | 0.90  |
| H21          | V2    | 12/8/2022 | 5.32  | 5.18         | 5.47          | 0.02     | 0.02            | 0.03             | 0.05  |
| H17          | V2    | 1/27/2023 | 3.88  | 3.35         | 4.41          | 0.03     | 0.00            | 0.05             | 0.00  |
| H19          | V2    | 2/10/2023 | 2.21  | 2.13         | 2.29          | 0.05     | 0.04            | 0.05             | 0.06  |
| H22          | V2    | 3/3/2023  | 7.57  | 7.12         | 8.01          | -0.08    | -0.13           | -0.03            | 0.04  |
| H23          | V2    | 4/6/2023  | 1.72  | 1.60         | 1.83          | -0.05    | -0.07           | -0.03            | 0.07  |
| H24          | V1    | 7/13/2023 | 6.20  | 5.87         | 6.53          | 0.24     | 0.20            | 0.27             | 0.10  |
| H25          | V1    | 7/13/2023 | 9.64  | 9.10         | 10.18         | -0.18    | -0.23           | -0.13            | 0.03  |
| H26          | V1    | 7/20/2023 | 2.93  | 2.55         | 3.31          | 0.49     | 0.45            | 0.53             | 0.65  |
| H28          | V1    | 7/27/2023 | 6.13  | 5.89         | 6.37          | 0.07     | 0.05            | 0.09             | 0.03  |
| H30          | V1    | 8/10/2023 | 3.26  | 3.06         | 3.47          | 0.20     | 0.18            | 0.22             | 0.16  |
| H29          | V2    | 8/21/2023 | 3.40  | 3.23         | 3.57          | 0.20     | 0.16            | 0.24             | 0.08  |
| H26          | V2    | 8/28/2023 | 5.43  | 5.17         | 5.70          | 0.36     | 0.32            | 0.40             | 0.18  |
| H32          | V1    | 8/28/2023 | 6.28  | 5.97         | 6.59          | 0.06     | 0.02            | 0.10             | 0.01  |
| H19          | V3    | 8/31/2023 | 0.91  | 0.73         | 1.08          | 0.10     | 0.06            | 0.13             | 0.03  |

## S.8 Summary Statistics from Method 1

Equations for Calculating the Averages  $C_s$ ,  $F_{in}$ , and  $R_2$

$$\bar{C}_s = \frac{\sum_{i=1}^n C_{s,i}}{n} \quad (S1)$$

Where:

$C_{s,i}$ = Intercept, PM<sub>2.5</sub> contribution ( $\mu\text{g}/\text{m}^3$ ) from indoor sources for visit i

n = Number of visits grouped by air conditioner type (AC or EC) and season (Winter and Summer)

$\bar{C}_s$ = Average indoor contribution by group (air conditioner type and season).

$$\bar{F}_{in} = \frac{\sum_{i=1}^n F_{in,i}}{n} \quad (S2)$$

Where:

$F_{in,i}$ = Infiltration factor for visit i

n = Number of visits grouped by air conditioner type (AC or EC) and season (Winter and Summer)

$\bar{F}_{in}$ = Average infiltration factor by group (air conditioner type and season).

$$\bar{R}_2 = \frac{\sum_{i=1}^n R_{2,i}}{n} \quad (S3)$$

Where:

$R_{2,i}$ =  $R_2$  goodness of fit for visit i

n = Number of visits grouped by air conditioner type (AC or EC) and season (Winter and Summer)

$\bar{R}_2$ = Average  $R_2$  by group (air conditioner type and season).

**Table S11.** Summary statistics from concentrations, I/O, and output from Method 1 calculations.

|                 |        | Central Air Conditioning |       |    | Evaporative Cooler |       |    |         |
|-----------------|--------|--------------------------|-------|----|--------------------|-------|----|---------|
| statistic       | season | Mean                     | SD    | n  | Mean               | SD    | n  | p-value |
| Outdoor UDAQ    | Summer | 9.51                     | 7.64  | 20 | 7.93               | 3.89  | 15 | 0.43    |
| Outdoor UDAQ    | Winter | 8.90                     | 7.21  | 10 | 5.96               | 2.81  | 5  | 0.28    |
| Outdoor SidePak | Summer | 19.51                    | 22.82 | 20 | 12.17              | 10.13 | 15 | 0.21    |
| Outdoor SidePak | Winter | 12.41                    | 13.87 | 10 | 11.02              | 7.99  | 5  | 0.81    |
| Indoor SidePak  | Summer | 7.68                     | 6.53  | 20 | 10.41              | 9.94  | 15 | 0.37    |
| Indoor SidePak  | Winter | 3.93                     | 2.89  | 10 | 4.22               | 2.23  | 5  | 0.83    |
| I/O             | Summer | 0.55                     | 0.32  | 20 | 0.83               | 0.24  | 15 | 0.01    |
| I/O             | Winter | 0.63                     | 0.56  | 10 | 0.48               | 0.24  | 5  | 0.47    |
| Cs              | Summer | 3.33                     | 6.14  | 20 | 3.73               | 3.43  | 15 | 0.81    |
| Cs              | Winter | 3.36                     | 2.34  | 10 | 4.14               | 2.39  | 5  | 0.56    |
| Fin             | Summer | 0.12                     | 0.23  | 20 | 0.39               | 0.39  | 15 | 0.03    |
| Fin             | Winter | 0.07                     | 0.14  | 10 | -0.01              | 0.05  | 5  | 0.12    |
| R <sup>2</sup>  | Summer | 0.13                     | 0.20  | 20 | 0.34               | 0.35  | 15 | 0.04    |
| R <sup>2</sup>  | Winter | 0.06                     | 0.07  | 10 | 0.04               | 0.03  | 5  | 0.58    |

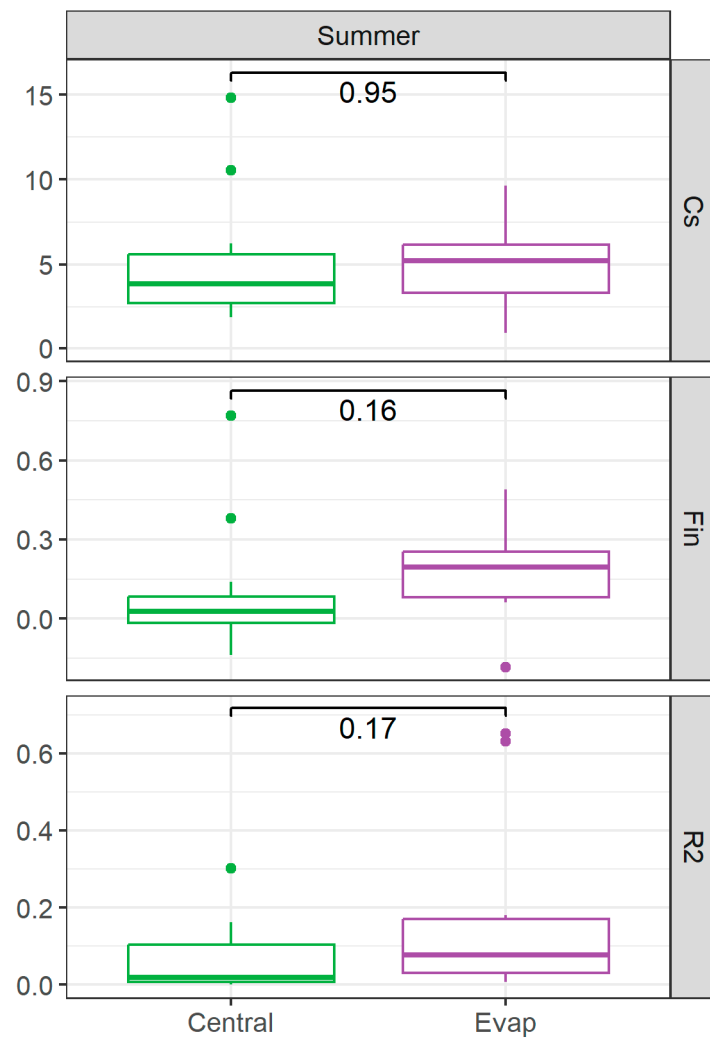

**Figure S13.** Box plots of the  $C_s$ ,  $F_{in}$ , and  $R^2$  estimated for each house visit organized by air conditioner type for summer visits with the wildfire visits removed. The horizontal black lines and numbers are the p-values comparing the averages from two-sample t-tests.

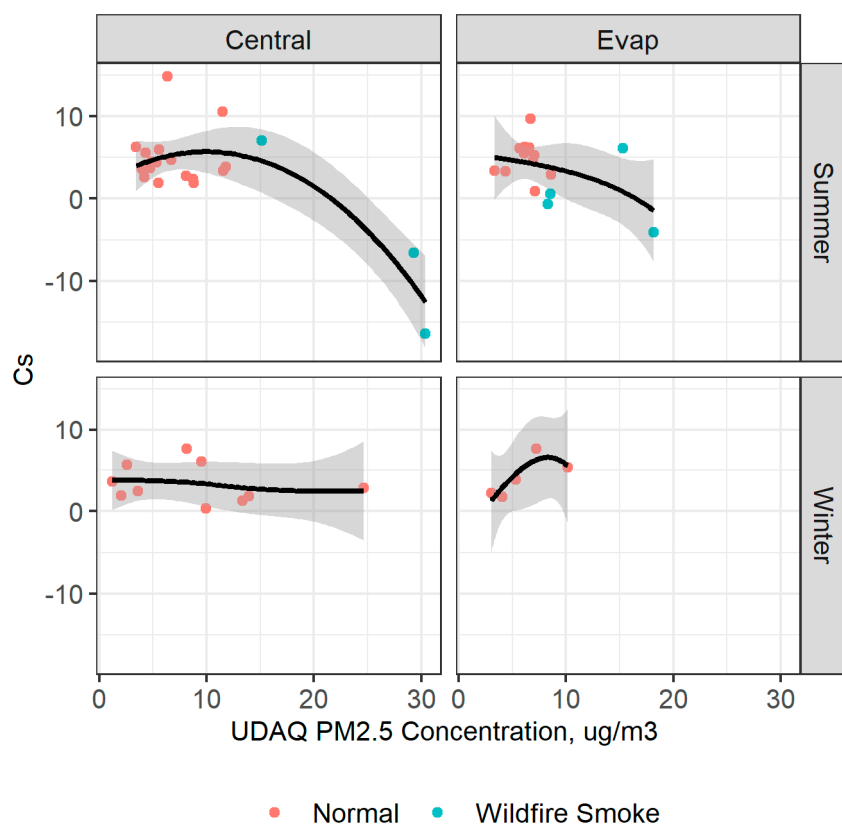

**Figure S14.** Correlation of  $C_s$  (Contribution of Indoor Sources) with outdoor PM<sub>2.5</sub> concentrations measured from the nearest Utah Division of Air Quality (UDAQ) monitor to the house. The black line is a Loess smoothing function, and the grey shadow shows the observations that are within the standard error of the model predictions [42].

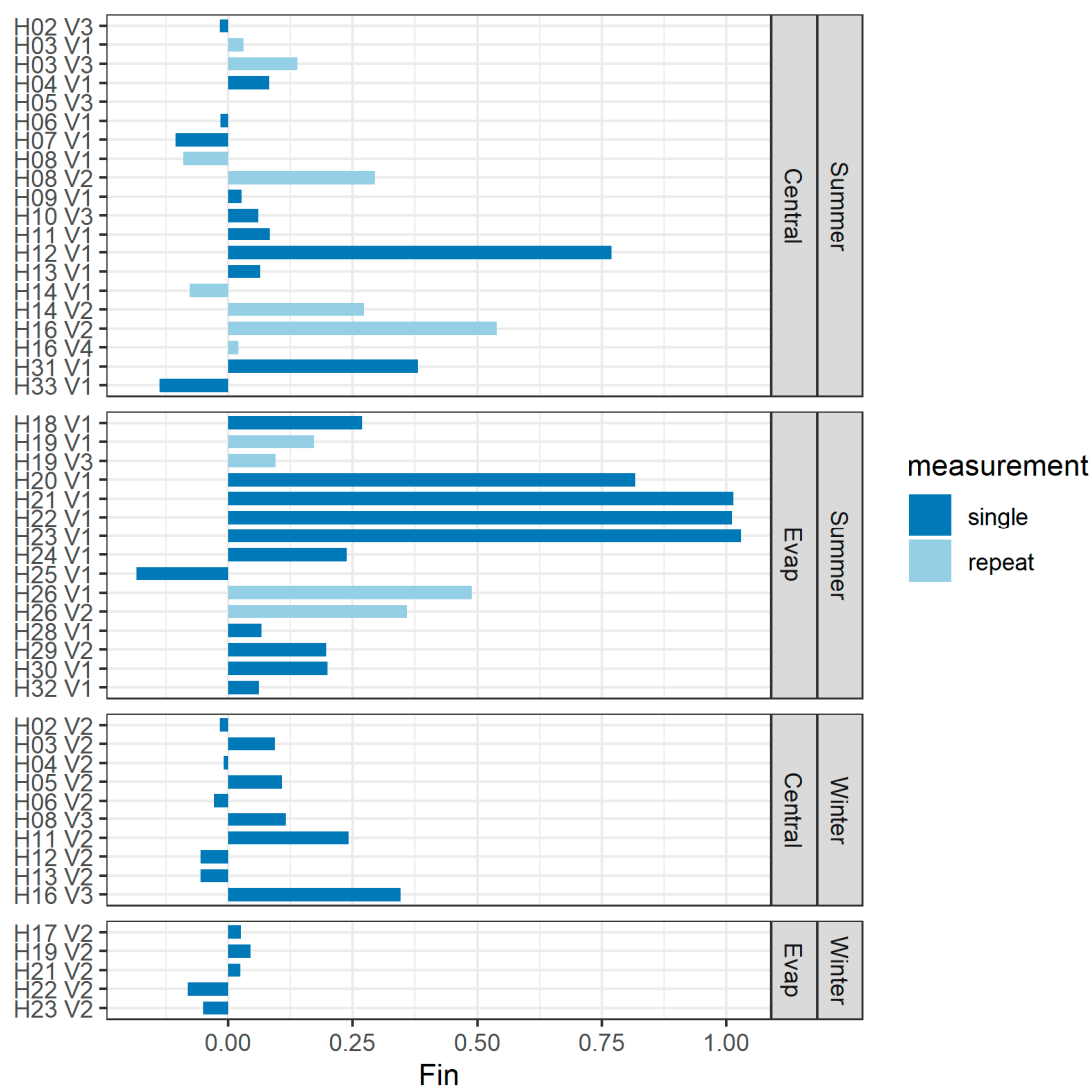

**Figure S15.** Infiltration Factor (Fs) estimated for each house visit. The repeated measurements from the same house during the same season are indicated in light-blue.



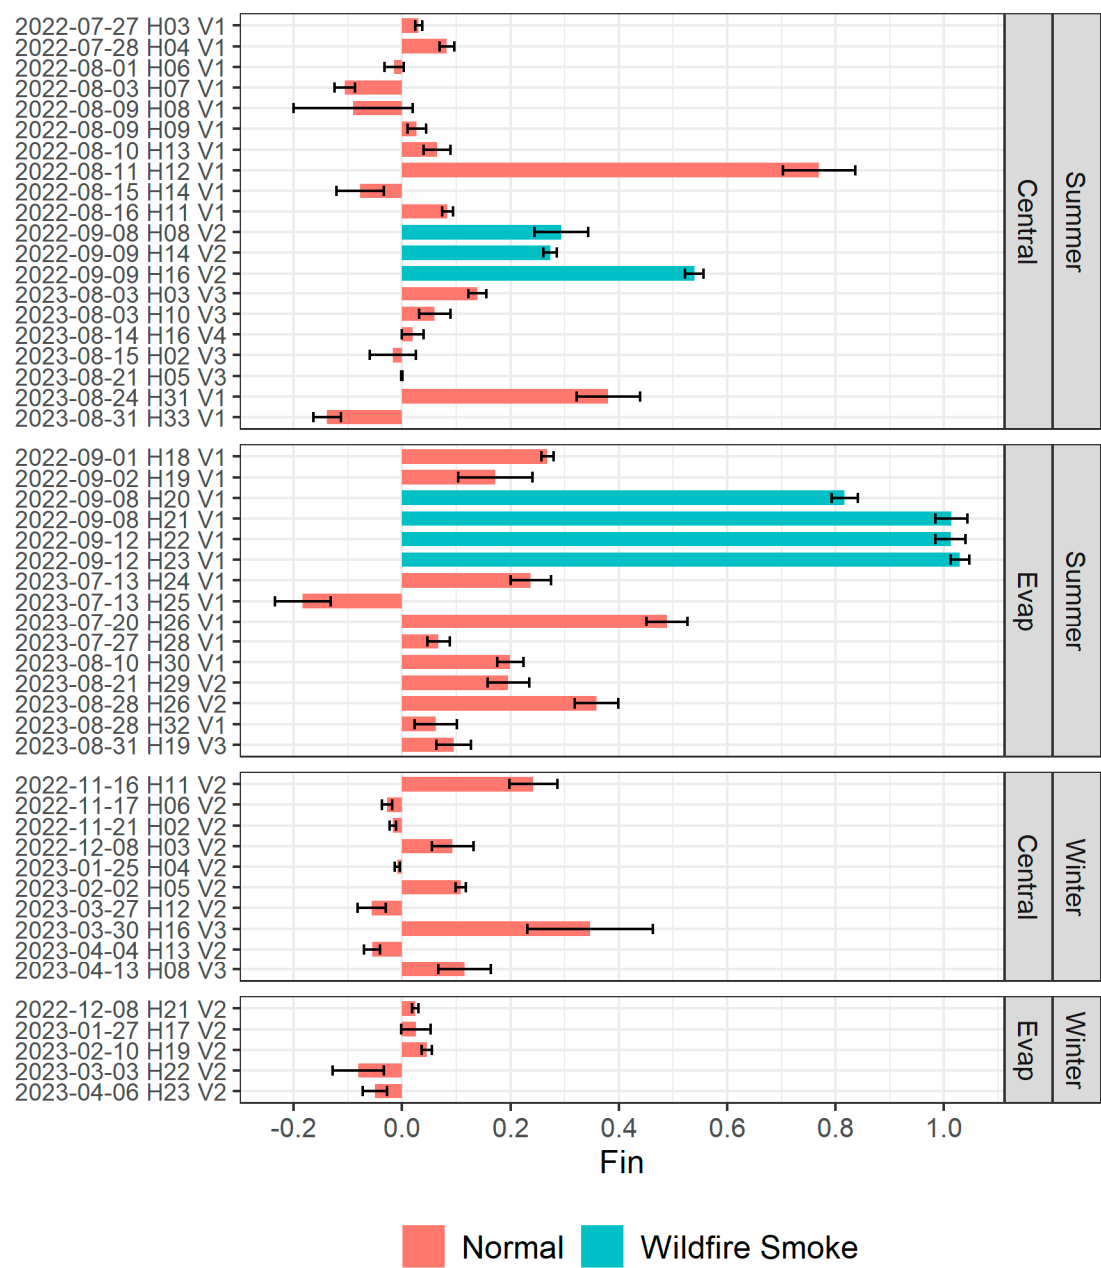

**Figure S16.** Infiltration Factor ( $F_{in}$ ) estimated for each house visit organized by season, air conditioning type and date. Error bars are the 95% confidence intervals of the  $F_{in}$  estimate.

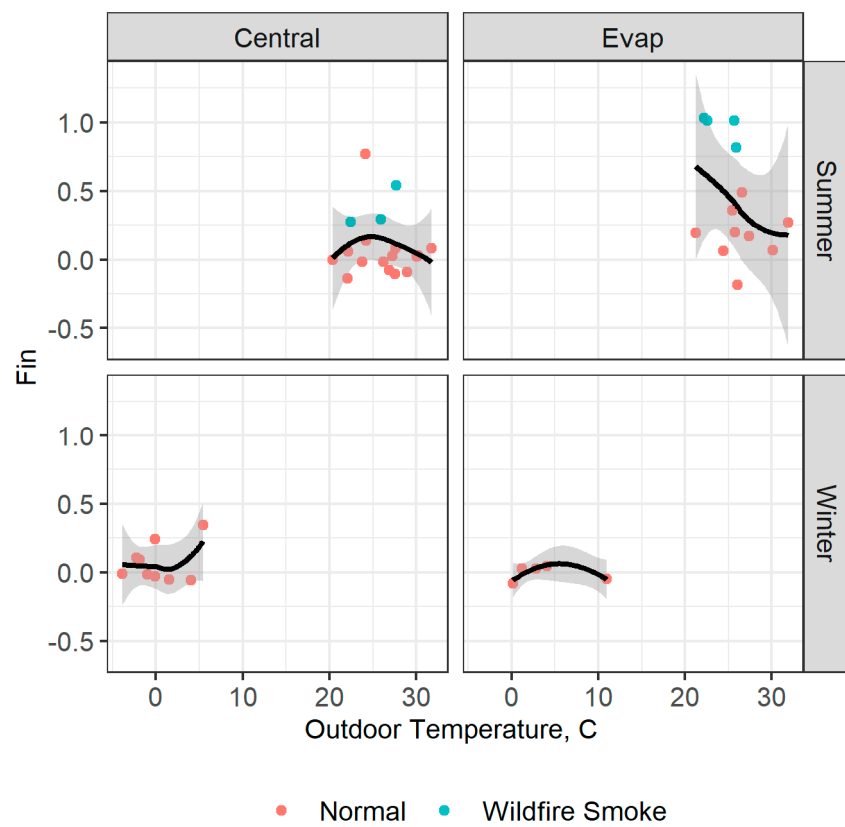

**Figure S17.** Correlation of Infiltration Factors ( $F_{in}$ ) with outdoor average temperature

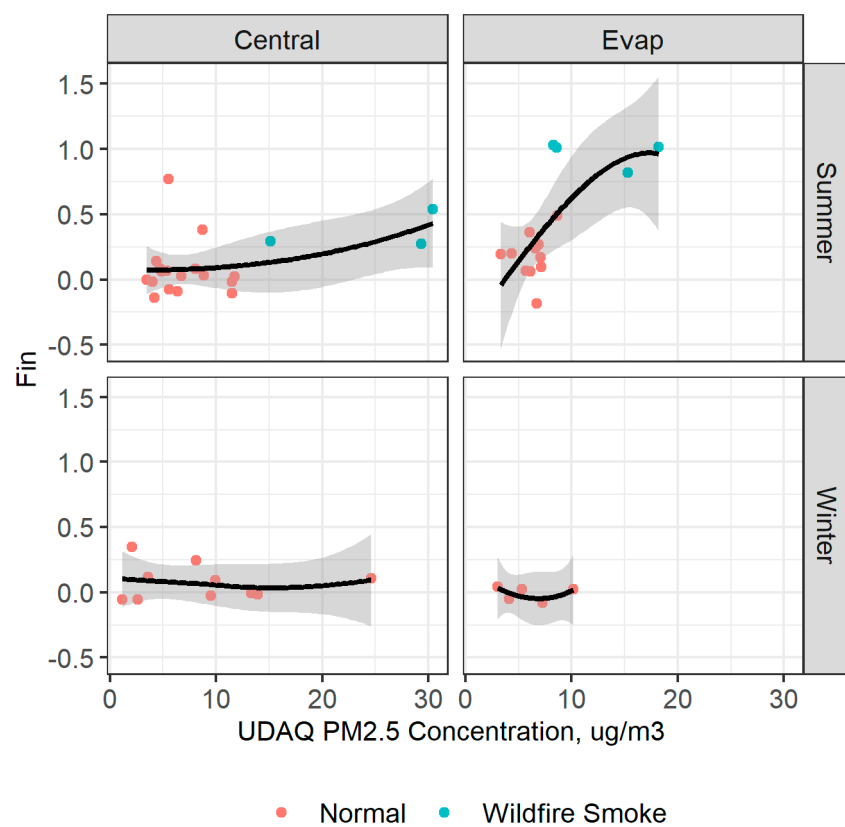

**Figure S18.** Correlation of Infiltration Factors ( $F_{in}$ ) with outdoor PM<sub>2.5</sub> concentrations measured from the nearest Utah Division of Air Quality (UDAQ) monitor to the house.

## S.9 Infiltration Factor Estimates using Method 2

**Table S12.** Model coefficients for  $C_{in}$  and  $F_{in}$  by air conditioner type and season estimated using Equation (1)

| Group                        | Observations | Coefficient | Estimate | Std Error | t-value | 2.5 <sup>th</sup><br>percentile | 97.5 <sup>th</sup><br>percentile | p-value |
|------------------------------|--------------|-------------|----------|-----------|---------|---------------------------------|----------------------------------|---------|
| AC + Summer                  | 20           | $C_{in}$    | 3.02     | 1.10      | 2.75    | 0.72                            | 5.32                             | 0.01    |
|                              |              | $F_{in}$    | 0.24     | 0.04      | 6.43    | 0.16                            | 0.32                             | 4.7E-06 |
| EC + Summer                  | 15           | $C_{in}$    | -1.32    | 0.80      | -1.64   | -3.04                           | 0.40                             | 0.12    |
|                              |              | $F_{in}$    | 0.96     | 0.05      | 18.73   | 0.85                            | 1.07                             | 8.7E-11 |
| AC + Winter                  | 10           | $C_{in}$    | 3.21     | 1.28      | 2.51    | 0.32                            | 6.10                             | 0.04    |
|                              |              | $F_{in}$    | 0.06     | 0.07      | 0.81    | -0.10                           | 0.22                             | 0.44    |
| EC + Winter                  | 5            | $C_{in}$    | 2.41     | 1.72      | 1.40    | -2.36                           | 7.19                             | 0.26    |
|                              |              | $F_{in}$    | 0.16     | 0.13      | 1.25    | -0.20                           | 0.53                             | 0.30    |
| AC + Summer + No<br>Wildfire | 17           | $C_{in}$    | 4.43     | 1.41      | 3.15    | 1.45                            | 7.41                             | 6.6E-03 |
|                              |              | $F_{in}$    | 0.09     | 0.11      | 0.80    | -0.14                           | 0.32                             | 0.43    |
| EC + Summer + No<br>Wildfire | 11           | $C_{in}$    | 1.80     | 1.66      | 1.09    | -1.89                           | 5.49                             | 0.31    |
|                              |              | $F_{in}$    | 0.54     | 0.19      | 2.90    | 0.13                            | 0.96                             | 0.02    |

### Statistical Comparison of Method 2 $F_{in}$ by air conditioner type

To determine if the infiltration factor ( $F_{in}$ ) estimated using method 2 was significantly different between the house visits with central air conditioners and evaporative coolers, we pooled the average SidePak PM<sub>2.5</sub> concentrations data from each house visits within each season and fit the linear model shown in equation (S4).

$$C_{in\ i} = C_s + EVAP + F_s C_{out\ i} + (F_s \times EVAP) C_{out\ i} + e_i, \quad (S4)$$

Where:

$C_{in\ i}$  = Average Indoor SidePak PM<sub>2.5</sub> concentration (ug/m<sup>3</sup>) for visit, i

$C_s$  = Intercept, Average PM<sub>2.5</sub> contribution (ug/m<sup>3</sup>) from indoor sources

EVAP = effect of evaporative cooler on  $C_s$  (ug/m<sup>3</sup>)

$C_{out\ i}$  = Average Outdoor SidePak PM<sub>2.5</sub> concentration (ug/m<sup>3</sup>) for visit, i

$F_{in}$  = Slope (Average Infiltration factor)

$F_s \times EVAP$  = interaction effect of evaporative cooler on  $F_{in}$

$e_i$  = Error in the linear model fit for visit, i

The results of the model fit are displayed in Table S13 for the summer visits and in Table S14 for the winter observations. For the summer visits, the infiltration factor ( $F_{in}$ ) is larger for visits with evaporative coolers than homes

with central air conditioners with a high degree of significance. For the winter visits, the infiltration factor is larger for homes with evaporative coolers, but the difference is not statistically significant.

**Table S13.** Model coefficients for the summer observations (n=35)

|                          | Estimate | Std Error | t-value | $p >  t $ |
|--------------------------|----------|-----------|---------|-----------|
| $C_{in}$                 | 0.85     | 0.78      | 1.08    | 0.19      |
| EVAP                     | -3.07    | 1.11      | -2.77   | 0.01      |
| $F_s$                    | 0.60     | 0.04      | 13.81   | 4.5E-14   |
| $F_s \times \text{EVAP}$ | 0.51     | 0.06      | 8.32    | 5.0E-09   |

**Table S14.** Model coefficients for the winter observations (n=15)

|                          | Estimate | Std Error | t-value | $p >  t $ |
|--------------------------|----------|-----------|---------|-----------|
| $C_{in}$                 | 2.81     | 1.27      | 2.21    | 0.05      |
| EVAP                     | -0.57    | 1.80      | -0.31   | 0.76      |
| $F_s$                    | 0.11     | 0.09      | 1.21    | 0.25      |
| $F_s \times \text{EVAP}$ | 0.08     | 0.13      | 0.58    | 0.57      |

We also fit the linear regression model in Equation S4 to the summer observations, with the seven days with wildfire smoke removed.  $F_{in}$  is still much larger for the visits with evaporative coolers, but the effect is no longer significant (p-value = 0.14. Table S15).

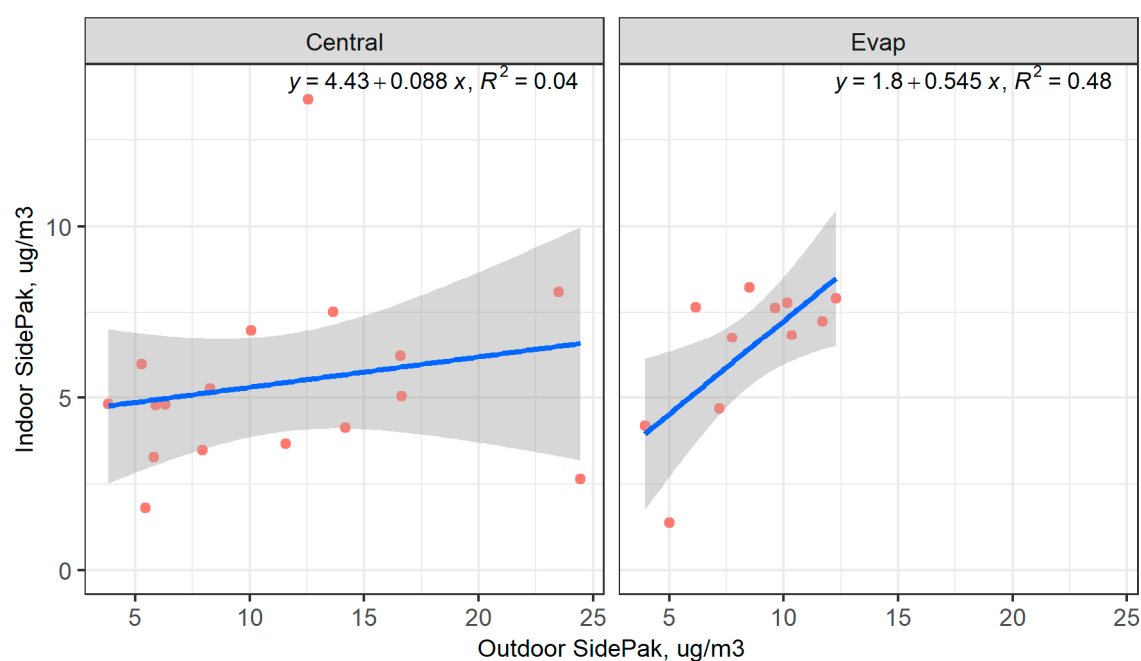

**Figure S19.** Average indoor and outdoor SidePak PM<sub>2.5</sub> concentrations for the summer home visits by air conditioner type, with the five visits that occurred on wildfire smoke days removed (Reference outdoor PM<sub>2.5</sub> > 15 µg/m<sup>3</sup>)

**Table S15.** Model coefficients for the summer observations without the days with wildfire smoke (n=28)

|                       | Estimate | Std Error | t-value | $p >  t $ |
|-----------------------|----------|-----------|---------|-----------|
| C <sub>in</sub>       | 4.43     | 1.22      | 3.63    | 0.00      |
| EVAP                  | -2.63    | 2.75      | -0.96   | 0.35      |
| F <sub>s</sub>        | 0.09     | 0.10      | 0.92    | 0.36      |
| F <sub>s</sub> × EVAP | 0.46     | 0.30      | 1.55    | 0.14      |

## S.10. Comparison of Infiltration Factor Estimates using Method 1 and Method 2

**Table S16.** Comparison of Infiltration Factor Estimates using Method 1 and Method 2

| Season |                                  | Central Air (AC) |              |              | Evaporative (EC) |              |              |
|--------|----------------------------------|------------------|--------------|--------------|------------------|--------------|--------------|
|        |                                  | Estimate         | Lower<br>95% | Upper<br>95% | Estimate         | Lower<br>95% | Upper<br>95% |
| Summer | Mean F <sub>in</sub>             |                  |              |              |                  |              |              |
|        | from                             | 0.12             | 0.01         | 0.22         | 0.39             | 0.17         | 0.61         |
|        | Method 1                         |                  |              |              |                  |              |              |
|        | F <sub>in</sub> from<br>Method 2 | 0.23             | 0.15         | 0.32         | 0.96             | 0.85         | 1.07         |
| Winter | Mean F <sub>in</sub>             |                  |              |              |                  |              |              |
|        | from                             | 0.07             | -0.02        | 0.17         | -0.01            | -0.08        | 0.06         |
|        | Method 1                         |                  |              |              |                  |              |              |
|        | F <sub>in</sub> from<br>Method 2 | 0.06             | -0.10        | 0.22         | 0.16             | -0.20        | 0.53         |

## S.11 References

55. US EPA. Outdoor Air Quality Data. 2023. <https://www.epa.gov/outdoor-air-quality-data/download-daily-data> (accessed 2023 November 13, 2023).
56. US EPA. AirNow API. 2023. <https://docs.airnowapi.org/> (accessed 2023 November 14, 2023).
57. UDAQ. Annual Monitoring Network Plan 2022. Utah Department of Environmental Quality, 2023. <https://documents.deq.utah.gov/air-quality/planning/air-monitoring/DAQ-2022-007189.pdf> (accessed 2023 July 19, 2022).
58. National Weather Service. NOWData - NOAA Online Weather Data. 2023. <https://www.weather.gov/wrh/Climate?wfo=slc> (ac-cessed 2023 11/10/2023).
